# LEAFY AND WEEDY SEADRAGON GENOMES CONNECT GENIC AND REPETITIVE DNA FEATURES TO THE EXTRAVAGANT BIOLOGY OF SYNGNATHID FISHES

**Running Title:** The genomes of two seadragon species

## AUTHORS

Clayton M. Small<sup>1,2=#</sup>, Hope M. Healey<sup>1</sup>, Mark C. Currey<sup>1</sup>, Emily A. Beck<sup>1,2</sup>, Julian Catchen<sup>3</sup>, Angela S. P. Lin<sup>4</sup>, William A. Cresko<sup>1,2#</sup>, and Susan Bassham<sup>1=#</sup>

<sup>1</sup> Institute of Ecology and Evolution, University of Oregon, Eugene, OR 97403

<sup>2</sup> Presidential Initiative in Data Science, University of Oregon, Eugene, OR 97403

<sup>3</sup> Department of Evolution, Ecology and Behavior, University of Illinois at Urbana-Champaign, Urbana, IL 61801

<sup>4</sup> Knight Campus for Accelerating Scientific Impact, University of Oregon, Eugene, OR 97403

<sup>#</sup>Contributed equally

## ORCID IDs

|          |                     |
|----------|---------------------|
| C.M.S.   | 0000-0003-1615-7590 |
| H.M.H.   | 0000-0001-9978-1553 |
| M.C.C.   | 0000-0003-3688-7208 |
| E.A.B.   | 0000-0001-9810-5094 |
| J.C.     | 0000-0002-4798-660X |
| A.S.P.L. | 0000-0001-5349-927X |
| W.A.C.   | 0000-0002-3496-8074 |
| S.B.     | 0000-0002-7309-2095 |

## #Corresponding Authors

Susie Bassham, William A. Cresko and Clayton M. Small

**Author Contributions:** S.B. and C.M.S. conceived of the project, and along with W.A.C. planned the work and provided general oversight of the project. S.B. and C.M.S. generated the seadragon sequencing data, and C.M.S. performed the genome assemblies. M.C.C. led the genome annotation and assisted C.M.S. with annotation and analysis of TEs. J.C. and S.B. performed the conserved synteny analysis. C.M.S. performed the global gene family evolution analyses. In-depth analyses of FGF/FGFR gene family evolution were performed by S.B., H.M.H. E.A.B. S.B. and A.S.P.L. prepared the weedy seadragon specimen for scanning, A.S.P.L. performed Zeiss Xradia scans and initial image processing, and H.M.H. led image processing for figure composites. H.M.H. also performed the analysis of microRNAs, with initial data generation and processing performed by S.B. and C.M.S. M.C.C. produced all fish illustrations for the figures. S.B. and C.M.S. took the lead in writing the manuscript, and all authors made writing contributions. The work was performed in the laboratory of W.A.C. at the University of Oregon with funding to W.A.C.

**Keywords:** genome sequencing, novel traits, evolution, miRNA, transposable elements, molecular evolution, fibroblast growth factors, syngnathids

1 **Abstract**

2

3 Seadragons are a remarkable lineage of teleost fishes, and they are members of the  
4 family Syngnathidae renowned for having evolved male pregnancy. Comprising three  
5 known species, seadragons are widely recognized and admired for their fantastical  
6 body forms and coloration, and their specific habitat requirements have made them  
7 flagship representatives for marine conservation and natural history interests. Until  
8 recently, a gap has been the lack of significant genomic resources for seadragons. We  
9 have produced gene-annotated, chromosome-scale genome models for the leafy and  
10 weedy seadragon to advance investigations into evolutionary innovation and  
11 elaboration of morphological traits in seadragons as well as their pipefish and seahorse  
12 relatives. We identified several interesting features specific to seadragon genomes,  
13 including divergent non-coding regions near a developmental gene important for  
14 integumentary outgrowth, a high genome-wide density of repetitive DNA, and recent  
15 expansions of transposable elements and a vesicular trafficking gene family.  
16 Surprisingly, comparative analyses leveraging the seadragon genomes and additional  
17 syngnathid and outgroup genomes revealed striking, syngnathid-specific losses in the  
18 family of fibroblast growth factors (FGFs), which likely involve re-organization of highly  
19 conserved gene regulatory networks in ways that have not previously been  
20 documented in natural populations. The resources presented here serve as important  
21 tools for future evolutionary studies of developmental processes in syngnathids and will  
22 be a key resource for conservation studies of the extravagant seadragons and their  
23 relatives.

24

25

26

27

28

29

30

31

32

33

## INTRODUCTION

34

35

36

37

38

39

40

41

42

43

44

45

46

47

48

49

50

51

52

53

54

55

56

57

Seadragons are phenotypic outliers in an already exceptional clade of teleost fishes (Family Syngnathidae) that also includes seahorses and pipefishes. For this reason, seadragons are often a colorful, flagship group in discussions of adaptation and evolutionary innovation. Seadragons demonstrate strikingly derived characters compared to their pipefish and seahorse relatives, including “leafy appendages,” extreme curvature of the spine (kyphosis and lordosis), especially elongated craniofacial bones, and large body size (Figure 1)(Dawson, 1985; Stiller et al., 2015). Substantial differences in these traits exist even among the three known extant species: *Phycodurus eques* (leafy seadragon), *Phyllopteryx taeniolatus* (weedy, or common, seadragon), and the recently described *Phyllopteryx dewysea* (ruby seadragon) (Stiller et al., 2015).

In addition to being a focus for evolutionary studies, seadragons are of significant cultural and conservation interest (Connolly et al., 2002; Martin-Smith & Vincent, 2006; Stiller et al., 2017). Presumed adaptations for crypsis including the leafy appendages, unique body plan, and elaborate skin coloration contribute to the status of seadragons as distinguished and valued cultural symbols for the people of Australia, where seadragon species are endemic. Because seadragon distributions are specific to temperate Australian macroalgal reefs, and their population sizes are relatively small, seadragons are likely susceptible to negative human impacts including global climate change. Furthermore, recent population genomic studies documenting significant population structure (Klanten et al., 2020; Stiller et al., 2021) in these species are especially relevant to conservation decisions. The unique evolutionary innovations, cultural importance, and conservation challenges all elevate the need to better understand and conserve seadragon species.

58           To improve our understanding of highly derived phenotypic traits and genomic  
59 features within seadragons, as well as those that are shared but derived among the  
60 Syngnathidae, we sequenced and annotated chromosome-scale assemblies for a male  
61 leafy seadragon and a female weedy seadragon. In addition to the production of these  
62 genomic resources we carried out several comparative analyses among five syngnathid  
63 and many other teleost genomes to determine changes in genome organization and  
64 content, including a more detailed analysis of a few key gene families and regulatory  
65 elements that may be involved in the development of syngnathid phenotypic  
66 innovations. Lastly, we performed high-resolution 3D X-ray microscope scans of an  
67 adult, male weedy seadragon to more precisely view seadragon morphological  
68 innovations.

69           Our work reveals a number of seadragon-specific genomic features, including  
70 divergent conserved non-coding elements (CNEs) near key developmental genes, a  
71 unique microRNA gene repertoire, and expanded gene families related to immunity and  
72 vesicular trafficking. We also found that the seadragon genomes are highly repetitive for  
73 their sizes, with unique repeat abundance distributions. Because the seadragon lineage  
74 occupies a region of the syngnathid phylogeny that is relatively basal to most of the  
75 species diversity, we leveraged their phylogenetic position to identify several genomic  
76 synapomorphies of the family. These genomic features include the striking loss of  
77 several highly conserved fibroblast growth factor (FGF) genes, expansions and  
78 contractions of gene families related to immunity and potentially male pregnancy, and  
79 syngnathid-specific transposable element (TE) expansion.

80           With these new genome models and rich accompanying data, we grow the  
81 existing collection of high-quality genomic tools and insights for several syngnathid  
82 groups including genera *Syngnathus* (Roth et al., 2020; Small et al., 2016),

83 *Hippocampus* (Li et al., 2021; Lin et al., 2016), *Microphis* (Zhang et al., 2020), and most  
84 recently (published as of the writing of this paper) *Phyllopteryx* and *Syngnathoides* (Qu  
85 et al., 2021). We add to this quiver of syngnathid genomes useful in illuminating the  
86 evolution and development of puzzling syngnathid novelties such as male pregnancy  
87 and leaf-like appendages. These genomic resources will also support ongoing efforts to  
88 understand and conserve sensitive syngnathid populations, including phylogenetic  
89 umbrella species like the seadragons.

90

91

## MATERIALS AND METHODS

### 92 Seadragon genome assemblies

93 We isolated high molecular weight genomic DNA from tissues of an adult male  
94 leafy seadragon (*Phycodurus eques*) and from an adult female common (“weedy”)  
95 seadragon (*Phyllopteryx taeniolatus*). We then generated PacBio libraries for both  
96 species and sequenced 49.12 and 80.80 Gb, respectively. We also generated  
97 “shotgun” whole-genome sequencing (WGS) Illumina libraries for both species,  
98 sequencing 57.48 and 105.79 Gb, to estimate genome size and polish the PacBio  
99 assemblies (see Supplemental Methods for all software versions and non-default  
100 parameters). We assembled both genomes with Flye (Kolmogorov et al., 2019), using all  
101 PacBio data excluding “scraps” with default parameters and an estimated genome size  
102 of 600 Mb. We performed two rounds of polishing on the primary Flye assemblies with  
103 the tool arrow (Chin et al., 2013), using the PacBio reads and performed an additional  
104 two rounds of polishing for each genome with WGS Illumina data, using pilon (Walker et  
105 al., 2014). To organize Flye assemblies into putative chromosome-scale genome  
106 models we generated Hi-C libraries using Phase Genomics Proximo Animal kits, then

107 scaffolded using the 3D-DNA pipeline (Dudchenko et al., 2017) with breaking of original  
108 scaffolds disabled, followed by visualization and manual editing using Juicer and  
109 Juicebox (Dudchenko et al., 2018; Durand et al., 2016). We evaluated assembly quality  
110 and completeness using Quast (Gurevich et al., 2013) and BUSCO (Waterhouse et al.,  
111 2018).

112

113 **Draft short-read genome assemblies for *Doryrhamphus excisus* and *Synchiropus***  
114 ***splendidus***

115 To supplement our comparative analyses with additional syngnathid genomes  
116 and a close outgroup we isolated high molecular weight DNA and generated linked-  
117 reads assemblies for the bluestripe pipefish (*Doryrhamphus excisus*) and the Mandarin  
118 dragonet (*Synchiropus splendidus*). These assemblies were performed using 10x  
119 Genomics Chromium technology and the Supernova assembly software (Weisenfeld et  
120 al., 2017). Details for these assembly methods are as described in Stervander and  
121 Cresko (2021).

122

123 **mRNA-seq**

124 To generate mRNA-seq libraries, we extracted total RNA from tissues of the  
125 same *P. eques* and *P. taeniolatus* individuals as were used for PacBio genome  
126 sequencing. From the *P. eques* specimen, we dissected testis, leafy appendage, eye,  
127 and gill tissues. From *P. taeniolatus* we dissected ovary, leafy appendage, eye, and  
128 liver tissue (see Supplemental Methods). We used the Roche KAPA HyperPrep Kit to  
129 generate indexed, stranded mRNA-seq libraries for Illumina sequencing to obtain  
130 301.52 million paired-end 100 bp reads. We trimmed Illumina adaptors and low-quality  
131 regions from reads using process\_shortreads from the Stacks software suite (Catchen

132 et al., 2013; Catchen et al., 2011) and aligned cleaned RNA-seq reads from both  
133 seadragon species to both *P. taeniolatus* and *P. eques* genome assemblies using STAR  
134 aligner (Dobin et al., 2013).

135

### 136 **miRNA-seq**

137 To generate small RNA-seq reads we purified a small fraction of RNA from each  
138 tissue above using Zymo DirectZol columns and generated indexed sequencing  
139 libraries using the NextFlex Small RNA-seq Kit v3. We ran BMap (Bushnell, 2014) on  
140 the weedy and leafy seadragon genomes to align sequencing reads. We annotated  
141 miRNAs in the leafy seadragon based on sequence conservation with included species'  
142 miRNAs (Antarctic blackfin icefish (*Chaenocephalus aceratus*), platyfish (*Xiphophorus*  
143 *maculatus*), European perch (*Perca fluviatilis*), and threespine stickleback (*Gasterosteus*  
144 *aculeatus*), zebrafish (*Danio rerio*), spotted gar (*Lepisosteus oculatus*), and medaka  
145 (*Oryzias latipes*)) as described in the Prost! (Desvignes et al., 2019) manual (see  
146 Supplemental Methods). Additionally, to run Prost!, we supplied threespine stickleback  
147 noncoding sequences (Desvignes et al., 2019). We ran Prost! for the weedy seadragon  
148 by adding the leafy seadragon's annotations to the included species pool. We  
149 distinguished orthologous miRNAs for the seadragon species using synolog (Catchen et  
150 al., 2009) synteny software, which aligned the leafy seadragon genome with the  
151 stickleback genome. Any miRNA not initially identified in the sequencing reads were  
152 searched for in the leafy seadragon genome with BLASTN and vista plots.

153

### 154 **Genome annotation**

155 To facilitate the analysis of comparable annotations among genome assemblies,  
156 we performed new annotations for leafy seadragon (*P. eques*), weedy seadragon (*P.*

157 *taeniolatus*), Greater pipefish (*Syngnathus acus*), bluestripe pipefish (*Doryrhamphus*  
158 *excisus*), Mandarin dragonet (*Synchiropus splendidus*), and Pacific bluefin tuna (Smit et  
159 al.) (*Thunnus orientalis*) (see Supplemental Methods for all public sequence data  
160 accessions). Assemblies were soft-masked for repetitive elements and areas of low  
161 complexity with RepeatMasker (Smit et al.) using custom repeat libraries made by  
162 combining a teleost-specific library extracted from RepeatModeler2 (Flynn et al., 2020)  
163 with species-specific repeat libraries produced by running RepeatModeler on each  
164 species listed above. We aligned all RNA-seq data (including new and previously  
165 published reads) as described above and supplied the .bam files to BRAKER2 (Bruna et  
166 al., 2021) for genome annotation.

167         We evaluated the final BRAKER2 set of annotated genes for each genome using  
168 InterProScan (Jones et al., 2014) and retained a final, “filtered” version of the annotation  
169 if they showed InterProScan evidence other than disorder-based (i.e. MobiDB-lite). We  
170 subjected remaining amino acid sequences to blastp searches against the NCBI  
171 RefSeq protein database and retained those in the filtered annotation if they returned a  
172 hit (e-value threshold of 0.001). For all downstream analyses of protein-coding  
173 sequences based on these and other annotations, we selected the longest transcript  
174 per locus.

175

## 176 **Repeat annotation**

177         We characterized the repetitive content of 16 teleost genome assemblies (Figure  
178 S1; see Supp. Methods for accession numbers). With one exception (tiger tail seahorse  
179 (*Hippocampus comes*)), we focused exclusively on assemblies produced by long-read  
180 (i.e., PacBio or Oxford Nanopore) and/or linked-read (i.e., 10x Genomics) technologies.  
181 All genomes were subject to a unified repeat library generation and annotation



182 workflow. Briefly, we identified repeats *de novo* for each assembly using 1.  
183 RepeatModeler2 (Flynn et al., 2020) and 2. TransposonPSI (Haas). We combined those  
184 repeat predictions with teleost repeats extracted from RepeatMasker (Smit et al.)  
185 libraries and all sequences from the FishTEDB database (Shao et al., 2018)  
186 <http://www.fishtedb.org>). These sequences (576,007 in total) were classified using the  
187 RepeatClassifier module of RepeatModeler. We also clustered repeats at 80%  
188 sequence identity using USEARCH (Edgar, 2010) as a way to group and ultimately  
189 enumerate repeats based on sequence divergence (see Supp. Methods). We ran  
190 RepeatMasker on all 16 genome assemblies using all 576,007 sequences and  
191 integrated the aforementioned RepeatClassifier and USEARCH cluster IDs into the  
192 RepeatMasker output. Finally, we used RepeatClassifier taxonomy and USEARCH  
193 cluster membership as alternative grouping mechanisms to characterize the distribution  
194 of repeats within and among genomes (e.g., using heatmaps and rank abundance  
195 plots), and to ordinate genomes in repeat space (i.e., using PCA). Regional repeat  
196 abundance distributions for target gene families were compared to those from random  
197 samples of genes across the genome using resampling-style hypothesis tests. All  
198 downstream repeat analysis and visualizations were carried out using the R statistical  
199 language (R\_Core\_Team, 2019).

200

## 201 **Gene family evolution**

202 We used protein annotations from 21 teleost genomes (Figure 2; see Supp.  
203 Methods for accession numbers) to better understand gene family size evolution in  
204 seadragon and syngnathid lineages. We defined putative gene families via all-by-all  
205 blastp (Altschul et al., 1990) and clustering with mcl (Enright et al., 2002), then we  
206 conducted a series of gene family size evolution analyses using CAFE 5 (Mendes et al.,

207 2020). Briefly, we first fit an error model to account for artifactual (e.g., genome  
208 assembly or annotation error) family size variation, which was applied to subsequent  
209 CAFE runs. We fit a model assuming a single rate of gene family expansion/contraction  
210 ( $\lambda$ ) to the data and identified gene families evolving especially rapidly using CAFE's  
211 internal likelihood ratio tests (LRTs).

212 Of those gene families showing evidence for rapid evolution, we identified  
213 subsets for which branch-specific LRTs suggested extreme  $\lambda$ s along branches of  
214 interest: the terminal *P. eques* and *P. taeniolatus* branches, the internal branch leading  
215 to the seadragon lineage, and the internal branch leading to the syngnathid lineage. We  
216 also assigned each gene family to a KEGG orthology (KO) ID if possible, and we used  
217 this information to perform KEGG pathway overrepresentation analysis using  
218 ClusterProfiler (Yu et al., 2012), with respect to the branch-specific rapidly evolving  
219 gene families. Lastly, we fit several multiple- $\lambda$  models to the data in order to test  
220 hypotheses of overall  $\lambda$  differences (from a global  $\lambda$ ) for the internal seadragon branch  
221 and the internal syngnathid branch. To test these hypotheses we used CAFE to perform  
222 100 gene family simulations, fit the aforementioned models to the simulated data sets,  
223 and compared observed likelihood ratios (LRs) from the data to the LR distributions  
224 from the simulations. For details, see the Supplementary Methods.

225

### 226 **fgf and fgfr gene family characterization**

227 We collected fibroblast growth factor (FGF) and receptor (FGFR) amino acid  
228 sequences from Ensembl of several percomorph species (see Supplementary  
229 Methods). We aligned orthologs and screened the genome assemblies of syngnathids  
230 and outgroups based on Hidden Markov Model (HMM) profiles from the alignments,  
231 according to methods described in Small et al. (Small et al., 2016). In some cases, we

232 supplemented these sensitive searches with regional RNA-seq read alignments to  
233 correctly define exon boundaries. We conducted targeted, lineage-specific tests of  
234 positive selection using branch site-models in PAML (see Supplemental Methods) and  
235 tested for deleterious mutations using Provean (Choi & Chan, 2015).

236

### 237 **X-ray tomography and 3D model reconstruction**

238 We obtained a euthanized adult male weedy seadragon, fixed in neutral buffered  
239 formalin from the Tennessee Aquarium (Chattanooga, TN), and scanned it using a  
240 resolution of 54  $\mu\text{m}$  voxels on a Zeiss XRadia 620 Versa X-ray microscope at the  
241 University of Oregon Knight Campus for Accelerating Scientific Impact's X-ray Imaging  
242 Core Facility. The anterior of the fish including the head and cleithrum were scanned  
243 again at 17  $\mu\text{m}$  voxel resolution. Composite virtual three-dimensional reconstructions of  
244 the unstained specimen were generated using Dragonfly Pro and Dragonfly software  
245 (Object Research Systems). After completing scans of the unstained specimen, which  
246 allowed high contrast visualization of electron-dense bony structures, the fish was then  
247 dehydrated through an ethanol series, stained with an iodine-based X-ray contrast  
248 agent to enhance imaging of soft tissues, and a section of the rostral part of the stained  
249 tail that includes a pair of leafy appendages was scanned at 27  $\mu\text{m}$  voxel resolution  
250 (Figure 1; Figure S2; Supplemental Methods).

251

## 252 **RESULTS**

### 253 **PacBio assembly with Hi-C scaffolding yields chromosome-level genome models** 254 **for the leafy and weedy seadragon**

255 We estimated the haploid genome sizes for leafy and weedy seadragons to be  
256 644.0 Mb and 597.3 Mb, respectively, based on k-mer frequency analysis of Illumina

257 WGS data (Vurture et al., 2017). From this analysis we also estimated genome-wide  
258 heterozygosity for each individual to be 0.27 and 0.33%. Polished PacBio assemblies  
259 were 664.24 and 650.38 Mb, with scaffold N50s of 19.59 and 9.90 Mb. The longest Flye  
260 scaffolds were 38.02 and 29.83 Mb, and BUSCO completeness frequencies were 95%  
261 for both genomes. After scaffolding both polished PacBio assemblies using *P. eques*  
262 Hi-C reads, we obtained 23 putative chromosome models for each genome (Figure S3),  
263 which reflect 93.22% and 96.10% of the total length for final leafy and weedy  
264 seadragon genome models. These assembly and completeness metrics, our ability to  
265 annotate 22,256 and 22,043 protein-coding genes in the respective genomes, and  
266 extensive evidence for conserved synteny between the two seadragon assemblies  
267 (Figure S4), all support that these genome models are of high quality relative to  
268 available resources for teleost fishes. These genomes will therefore serve as useful  
269 tools for a variety of current comparative genomic analyses.

270

271 **Seadragon karyotypes are conserved relative to other syngnathid genomes but**  
272 **lack one of two chromosome fusions observed in *Syngnathus* and *Hippocampus***

273 Haploid chromosome number in syngnathid fishes, as assessed by karyotyping  
274 and genetic mapping, is reported to be 22 or 24 in seahorse (*Hippocampus*) species  
275 (Vitturi & Catalano, 1988; Vitturi et al., 1998) and 22 in Gulf pipefish (*Syngnathus*  
276 *scovelli*) (Small et al., 2016). In Gulf pipefish, the reduction in chromosome number from  
277 24, the putative ancestral number in ray-finned fishes (Mank & Avise, 2006) to 22 likely  
278 resulted from fusion of two pairs of chromosomes orthologous to Chromosomes 1 and  
279 24 and to Chromosomes 14 and 23 in platyfish (*X. maculatus*), a representative  
280 outgroup percomorph with 24 chromosomes (Small et al., 2016). Though a haploid  
281 number of 24 chromosomes in seahorse was reported (with some published confusion

282 about in which species this was observed (Vitturi & Catalano, 1988; Vitturi et al., 1998)  
283 the reference genome for tiger tail seahorse (*H. comes*) (Lin et al., 2016), provides  
284 conserved gene synteny evidence that both ancestral chromosome fusions were  
285 already present in the common ancestor of seahorses and *Syngnathus* pipefish (Figure  
286 S5). As stated, our inferred seadragon haploid chromosome number of 23 is based on  
287 the size distribution of Hi-C scaffolds (Figure S3). The seadragon lineage apparently  
288 shares only the ancestral Chromosome 1 to Chromosome 24 fusion with the  
289 seahorse+*Syngnathus* pipefish ancestor, leaving one to one orthologs of platyfish  
290 Chromosomes 14 and 23 (Figure S5).

291

292 **Seadragon genomes are highly repetitive for their compact size, with large**  
293 **contributions from relatively recent TE expansions**

294 A correlation between eukaryotic genome size and the proportion of a genome  
295 classifiable as TEs has led to an appreciation that TEs can be an important driver of  
296 genome size evolution (Kidwell, 2002). The relationship is particularly apparent among  
297 some of the well characterized genomes of teleost fish model species. Genome size  
298 and TE proportion share a positive, tightly linear relationship in a comparison of green  
299 spotted puffer (*Tetraodon nigroviridis*), threespine stickleback (*G. aculeatus*), medaka  
300 (*Oryzias latipes*), and zebrafish (*Brachydanio rerio*), whose genomes span a range from  
301 roughly 358 Mb to over 1.37 Gb (Gao et al., 2016). *Syngnathus* pipefish have genomes  
302 that rival green spotted puffer in genomic compactness, with assembly lengths of 307.0  
303 Mb for the Gulf pipefish (Small et al., 2016) (*S. scovelli*), and 324.33 Mb for the greater  
304 pipefish (*S. acus*) (NCBI RefSeq Genome GCF\_901709675.1). In the spectrum of  
305 vertebrate genomes, known seahorse genomes are also diminutive, estimated at 421

306 Mb for the lined seahorse (*H. erectus*) (Li et al., 2021) and 494 Mb for the tiger tail  
307 seahorse (*H. comes*) (Lin et al., 2016).

308 Our final genome assembly sizes for seadragons were 666.5 Mb for leafy  
309 seadragon and 652.2 Mb for weedy seadragon, which are appreciably larger than those  
310 of *Syngnathus* and *Hippocampus* but still much smaller than many other teleost  
311 genomes. Surprisingly, as much as 58.7% of the leafy and 57.9% of the weedy  
312 seadragon genome is composed of repetitive sequences, as classified by our workflow  
313 (see Methods). To assess whether seadragons or syngnathids are exceptional in their  
314 repetitive DNA characteristics, we measured the proportion of repetitive sequence in  
315 sixteen teleost genomes (Figure S1) using an in-common repeat reference library to  
316 create a standardized basis for comparison. Species were chosen for taxonomic  
317 breadth and because their genomes were assembled from long- or linked-read  
318 sequence data (except tiger tail seahorse). Genomes of five syngnathids were  
319 represented, including a seahorse and tail-brooding *Syngnathus* pipefish, the  
320 seadragons, and a basal lineage relative to these, the abdominal-brooding bluestripe  
321 pipefish (*D. excisus*).

322 We confirmed a strong, positive relationship between repeat content and  
323 genome size for the 16 genomes using phylogenetic generalized least squares (PGLS)  
324 regression ( $t_{16,14}=4.88$ ;  $p=0.0002$ ;  $b=0.00048$ ), but seadragons are notable outliers with  
325 large, positive residuals (Figure 3). Both seadragon genomes are unusually bloated with  
326 repetitive DNA among teleosts for their relatively compact size, a feature either derived  
327 specifically in the seadragon lineage or an ancestral lineage. This latter hypothesis is  
328 not yet testable given currently available genome assemblies but can be addressed  
329 with the addition of syngnathid genomes at key phylogenetic positions.

330 Repeat density was high across seadragon chromosomes, in stark contrast with  
331 the greater pipefish (Figure 4), which shows repeat “hotspots” almost exclusively near  
332 chromosome ends, and a close outgroup to syngnathids, common dragonet  
333 (*Callionymus lyra*), which has relatively uniform, low repeat density in general (Figure  
334 S6).

335 Several TE classes contribute notably to the large repeatomes of seadragons.  
336 The *Tc1* family of the *Tc1/Mariner* superfamily of transposases is a major contributor to  
337 repeatome composition variation among teleosts as revealed by PCA based on within-  
338 repeatome relative class proportions, with seadragons, platyfish (*X. maculatus*), and  
339 Northern pike (*Esox lucius*) genomes influenced heavily by abundant *Tc1* repeats  
340 (Figure 3). Phylogenetic patterns of repeat abundance among the fish lineages we  
341 analyzed suggest *Tc1* expansion in the syngnathid lineage, given lower *Tc1*  
342 abundances in the close outgroups of common dragonet, (*C. lyra*), and Pacific bluefin  
343 tuna (*T. orientalis*). Among syngnathids, *Tc1* repeats compose a disproportionately  
344 large fraction of seadragon repeatomes (Figure 3). This class of “cut-and-paste” DNA  
345 transposons is widespread in animals and especially common in teleost fishes, with  
346 high abundance and variability among species (Gao et al., 2017; Gao et al., 2016). In  
347 fact, phylogenetic evidence suggests *Tc1* transposons are still active and recently  
348 expanding in some neoteleosts, such as threespine stickleback (*G. aculeatus*) (Gao et  
349 al., 2017).

350 The second most abundant, classifiable TE category in the seadragon genomes  
351 was the *BovB* family of non-LTR LINE retrotransposons (Figure 3; Figure S7). This TE  
352 family is restricted to animal taxa, where its members are patchily distributed among  
353 lineages and have been inferred via phylogenetic analysis to populate animal genomes  
354 through horizontal transfer, perhaps via metazoan parasites (Ivancevic & Chuong, 2020;

355 Ivancevic et al., 2018). *BovB* density variation along seadragon chromosomes (Figure  
356 S7) was largely concordant with overall repeat density patterns (Figure S6), suggesting  
357 common mechanisms or constraints for the expansion of at least some TE families.

358 We also discovered an apparent expansion of *Tigger* transposases in the  
359 syngnathid clade, which are members of the *pogo* superfamily closely related to  
360 *Tc1/Mariner* (Gao et al., 2020). *Tigger* repeats are overrepresented in syngnathids  
361 compared to outgroups but proportionally are conserved among the five syngnathid  
362 genomes we analyzed (Figure 3). Unlike *Tc1* and *BovB*, *Tigger* repeat density variation  
363 along seadragon and *Syngnathus* pipefish chromosomes deviates from the collective  
364 pattern of repeat density (Figure S8), with the highest-density *Tigger* regions more  
365 centrally located, although the potential significance of this is unclear.

366 Because the grouping and enumeration of repeats according to classification  
367 alone comes with a loss of evolutionary resolution and precision, we also analyzed  
368 repeats as clusters of sequences with  $\geq 80\%$  sequence identity. PCA based on this  
369 cluster-wise treatment of repeats revealed that leafy and weedy seadragon genomes  
370 are quite divergent in repeat space from the other teleost species, including the three  
371 other syngnathids compared (Figure 5; Figure S9). In particular four repeat clusters are  
372 heavily influential in this regard, one of which was not classifiable but especially  
373 abundant in scaffolds unassigned to chromosomes (Cluster 20902), two of which  
374 belong to the *BovB* LINEs mentioned above (Clusters 10278 and 10626), and the last  
375 (Cluster 14395) belonging to the *Tc1* group of transposases mentioned above (Figure 5;  
376 Supplemental File 1).

377 We also generated rank abundance distributions (RADs) for repeat clusters in  
378 the 16 fish genomes, an approach from ecology used to understand community  
379 evenness and major and rare constituents (Whittaker, 1965). Interestingly, leafy and



380 weedy seadragon RADs show markedly high repeat cluster abundances relative to the  
381 other genomes for repeat ranks 1-20 (Figure 5). Among the highest-ranking repeats for  
382 both seadragon species are the four repeat clusters mentioned above as major  
383 contributors to the distinctiveness of seadragon repeatomes. These findings, along with  
384 the observation that members of the top-ranking seadragon repeat clusters are rare in  
385 the other genomes (Supplemental File 1), suggest that the unique repetitive features of  
386 seadragon genomes are driven largely by recent expansions of *BovB* and *Tc1*, and a  
387 yet-to-be-classified cluster.

388

389 **Gene family contractions in Syngnathidae involve innate immunity, and**  
390 **seadragon-specific expansions are associated with vesicular trafficking**

391 We identified 290 total gene families as having expanded or contracted at a rate  
392 ( $\lambda$ ) significantly higher than the background  $\lambda$  among 21 teleost species. Of these, 109  
393 showed evidence for rapid size evolution along the leafy seadragon branch, 113 along  
394 the weedy seadragon branch, 38 along the internal seadragon branch, and 31 along the  
395 internal branch leading to syngnathids (Figure 2; Supplemental File 2). Based on 100  
396 simulations of gene family evolution along the tree, we also inferred that  $\lambda$ s for the  
397 internal seadragon and syngnathid branches are respectively distinct from the global  $\lambda$   
398 for the tree, and likely distinct from one another (Figure S10).

399 Among the gene families most likely to have evolved rapidly in size in the  
400 ancestral syngnathid lineage, at least seven families related to innate immunity  
401 experienced contractions (Supplemental File 2), in contrast to multiple lines of evidence  
402 for expansion of inflammation and innate immunity gene families in teleosts relative to  
403 other vertebrates (Balla et al., 2020; Boudinot et al., 2011; Chang et al., 2021; Howe et  
404 al., 2016; Mattingsdal et al., 2018). Specifically, we found evidence for syngnathid-

405 specific contractions in NACHT, TRIM, and GIMAP gene families, consistent with some  
406 of the immunity and detoxification pathway gene families depleted in the genome of the  
407 Manado pipefish (*Microphis manadensis*) (Zhang et al., 2020).

408         Several functional categories (KEGG pathways) were overrepresented among  
409 gene families with large size changes in the seadragon lineage, including cancer,  
410 cardiomyopathy, and immunity (Supplemental File 2), primarily due to contraction  
411 events. In terms of gene family expansions along the branch leading to seadragons,  
412 however, two families with roles in vesicular trafficking - *Vacuolar Protein Sorting-*  
413 *Associated Protein 13B (vps13b)* and *Coatomer Protein Complex Subunit Beta 2*  
414 (*copb2*) – are notable. Sequences with high similarity to *copb2*, which encodes one  
415 subunit of a Golgi budding and vesicular trafficking protein complex (Waters et al.,  
416 1991), are especially abundant in seadragon genomes relative to other syngnathids and  
417 teleosts (Supplemental File 2).

418         Though tuna (*T. orientalis*) and platyfish (*X. latipes*), for example, have two  
419 paralogs of *copb2*, we could find evidence for only a single gene copy in the genomes  
420 of seahorse (*H. comes*) and pipefish (*S. acus*). By contrast, we detected the presence of  
421 at least nine and six copies (on the 26 longest Hi-C scaffolds) in leafy and weedy  
422 seadragon genomes (Supplemental File 3). We also found many sequences matching  
423 *copb2* on several short scaffolds, suggesting that the repetitive nature of this region  
424 prevented these from being incorporated into chromosome-scale scaffolds, or, but less  
425 likely (Figure S11), that they could be redundant artifacts. One of the *copb2* paralogs  
426 (on Pequ Hi-C scaffold 13, Ptae Hi-C scaffold 14) is the likely ortholog of platyfish  
427 *copb2* on the orthologous chromosome (Xmac 6), with the remaining copies likely  
428 expanding secondarily via an unknown mechanism.

429           Given the repetitive nature of these regions, we hypothesized that TE activity  
430 may have played a role in seadragon *copb2* expansion. Specifically, we first tested  
431 whether the seadragon-expanded TE classes of *BovB* and *Tc1* are overrepresented in  
432 the immediate vicinity (1-kb flanking both sides) of *copb2* copies, relative to  
433 randomly resampled gene groups. Both *BovB* (4.24-fold enriched;  $p < 0.002$ ) and *Tc1*  
434 (1.39-fold enriched;  $p < 0.002$ ) repeat classes were significantly overrepresented in  
435 *copb2* regions (Figure S11; Supplemental File 4). We secondarily performed naïve  
436 hypothesis tests with the false discovery rate (FDR) controlled at 0.05 to identify other  
437 TE classes with potential enrichment in these regions, revealing *Rex-Babar* LINEs, and  
438 *Tigger* and *Charlie* transposons as additional candidates (Supplemental File 4).

439

#### 440 **Syngnathid fishes have lost several FGF family genes, most notably *fgf3* and *fgf4***

441           The FGF and FGFR gene families include well-studied ligand and receptor  
442 signaling molecules central to vertebrate craniofacial, limb, dermal appendage, sensory  
443 placode, and hindbrain development, among many other functions (reviewed in Xie et  
444 al., 2020). Because of the prominence of FGF signaling in the morphogenesis of traits  
445 that are distinctively modified in syngnathids, we explored whether FGF ligands or their  
446 receptors are exceptional in seadragons and in three other representative lineages of  
447 syngnathids: flagtail pipefishes (the most basal lineage of the four), seahorses, and  
448 *Syngnathus* pipefishes (Figure 2).

449           The FGF and FGFR families in seadragons and other syngnathid fishes conform,  
450 with two notable exceptions mentioned below, to a broadly typical complement of gene  
451 paralogs relative to other percomorphs. Within the Syngnathidae, there are several  
452 lineage-specific losses of FGF and FGFR genes (Table S1). We did not detect *fgf9* in  
453 any syngnathid. Seadragons and *Syngnathus* pipefish have apparently lost *fgf4-like*,

454 while tiger tail seahorse (*Hippocampus comes*) and bluestripe pipefish (*Doryrhamphus*  
455 *excisus*) have retained it. *fgf17* is missing birds (Abramyan, 2015), in seadragons and  
456 bluestripe pipefish but is present in tiger tail seahorse and greater pipefish. Because  
457 flagtail pipefishes, the lineage to which bluestripe pipefish belongs, are basal to the  
458 clade containing seadragons, seahorses, and *Syngnathus* pipefish (Longo et al., 2017),  
459 *fgf17* therefore must have been lost at least twice. Evolutionary loss of *fgf17*, though  
460 uncommon, is not unique to syngnathid lineages; orthologs of this gene have been  
461 independently erased from other distant taxa, such as the medaka genus *Oryzias*  
462 (Canestro et al., 2007). In addition, at least two clades of *fgf5* and *fgfr1b* are present in  
463 seadragons, tiger tail seahorse, and blue-stripe pipefish, but these genes were not  
464 detected in the two *Syngnathus* pipefish genomes (*S. acus* and *S. scovelli*).

465         The most startling gene losses from the FGF family are shared across the  
466 seadragon, tiger tail seahorse, greater pipefish, and bluestripe pipefish lineages: all are  
467 missing *fgf3* and *fgf4* (Figure 6; Table S1). In percomorph outgroups to the syngnathids,  
468 *fgf3*, *fgf4*, and *fgf19* are clustered, with *fgf3* flanked by *ccnd1* and *lto1*, genes that are  
469 also missing from seadragons, seahorses, and greater pipefish (but bluestripe pipefish  
470 has retained *lto1* (Figure 6). The expected neighbors normally on the *fgf19* side of the  
471 cluster (*zgc:153993* and *ano1*) are present in seadragons and both lineages of  
472 pipefishes, but bluestripe pipefish has lost *fgf19*. Close outgroups to the syngnathids,  
473 the razorfish (*Aeoliscus strigatus*) and the mandarinfish (*Synchiropus splendidus*) (Longo  
474 et al., 2017) retain intact *fgf3/4/19* clusters, making it likely that drastic alteration to the  
475 cluster is a syngnathid synapomorphy (Figure S12). In the common ancestor of lobe-  
476 finned and ray-finned fishes, *fgf3*, *fgf4*, and *fgf19* were likely already clustered, and  
477 remain tandemly arrayed in representatives from jawed vertebrate lineages as  
478 separated as mammals and teleosts (Oulion et al., 2012). The syngnathid lineage has

479 therefore experienced a degree of change in this cluster that is perhaps unprecedented  
480 throughout gnathostome evolution.

481           Exceptional absences of FGF and FGFR members in extant syngnathid  
482 genomes suggest that some property of their syntenic neighborhoods is inherently  
483 volatile. We tested whether the local repeat landscape flanking significant regions of  
484 FGF, FGFR, and other developmental gene loss in syngnathids – the *fgf3/4/19* cluster,  
485 *fgf4l*, *fgf5*, *fgf17*, *fgfr1b*, *eve1* (Small et al., 2016), and *tbx4* (Lin et al., 2016; Small et al.,  
486 2016) - differs from that of genes in general, by using the leafy seadragon genome and  
487 the close syngnathid outgroup *C. lyra* (common dragonet) as a pre-loss comparator.  
488 While no individual repeat class was significantly enriched in these regions (of either  
489 genome) after FDR adjustment, several show nominal evidence for enrichment and are  
490 at high density in the leafy seadragon regions, including *Tc1*, *BovB*, *hAT-Ac*, and  
491 additional LINEs *Rex-Babar*, and *L2* (Figure S13; Supplemental File 4). Furthermore, we  
492 found support for the alternative hypothesis that *overall* repeat density in general is  
493 enriched in these regions (Figure S13; Supplemental File 4), but only for the leafy  
494 seadragon (Pequ: 1.45-fold enrichment;  $p = 0.022$ ), and not the dragonet genome (Clyr:  
495 1.11-fold enrichment;  $p = 0.27$ ).

496

#### 497 **Limited evidence for compensatory evolution in the FGF pathway**

498           FGF paralogs sometimes overlap in their expression and ability to compensate,  
499 partially or fully, for loss-of-function of one another in specific developmental contexts.  
500 In zebrafish, for example, knock down of either *fgf3* or *fgf10* causes relatively mild  
501 effects in lateral line migration and neuromast maturation, but there are severe lateral  
502 line defects when expression of both paralogs is depleted (Nechiporuk & Raible, 2008).  
503 We explored whether those paralogs most recently diverged from *fgf3* and *fgf4*, or with

504 overlapping developmental roles, showed evidence for compensatory evolution prior to  
505 the syngnathid radiation.

506 Syngnathid and close outgroup sequences are largely conserved for *fgf4-like*,  
507 *fgf6a*, *fgf7*, *fgf8a*, *fgf8b*, *fgf10a*, *fgf10b*, *fgf19*, *fgf20a*, *fgf20b*, *fgf22*, and *fgf24*, and  
508 exhibit no evidence of positive selection along the syngnathid branch (Table S2). We did  
509 find potential evidence for positive selection in *fgf6b*, although this test result was within  
510 the range of false discovery (Figure S14; Table S2). Second, although the gene was lost  
511 in the seadragons and blue striped pipefish lineages, we found the strongest evidence  
512 for positive selection on *fgf17*, which is retained in seahorse and *Syngnathus* pipefish  
513 (Table S2).

514 Like the ligands, the syngnathid FGF receptors are largely conserved, and we  
515 found no evidence of syngnathid lineage-specific positive selection for non-canonical  
516 *fgfr1a* and *fgfr1b*, nor for canonical *fgfr1a*, *fgfr2*, *fgfr3*, or *fgfr4*. In contrast, *fgfr1b*  
517 presented some evidence for positive selection (although not robust to false discovery),  
518 displaying surprising syngnathid-specific substitutions (Table S2). These include a likely  
519 deleterious substitution within the activation loop of the kinase domain, a position  
520 conserved not only across vertebrate Fgfr1 proteins, but across all canonical FGFR  
521 paralogy groups (Figure S15) (provean score= -6.123).

522 Although we did not find evidence for lineage-specific positive selection using  
523 codon-based models, leafy and weedy seadragons share a derived six amino acid  
524 deletion in a conserved region of the Fgf16 protein (Figure S16), while seahorse has  
525 amino acid substitutions in this same motif. Other representative percomorphs,  
526 chicken, and human Fgf16 protein sequences are identical across this region indicating  
527 a high level of conservation, though no function has yet been ascribed to this protein  
528 domain. Divergence of seadragon *fgf16* is not limited to the coding sequence. A

529 putative regulatory change is hinted at by the absence in both dragons of an  
530 approximately 240 bp conserved non-coding element (CNE) that is well preserved  
531 across percomorph fishes 5' of *fgf16* (Figure S17).

532

### 533 **miRNA-seq data from seadragons reveal loss of conserved microRNAs**

534 Although microRNAs (miRNAs) are important developmental regulators (Bizuyehu  
535 & Babiak, 2014), there are currently no annotations of these genes in syngnathids. In  
536 the leafy and weedy seadragons, we identified 261 and 251 miRNA genes that produce  
537 331 and 318 unique mature miRNAs (Supplemental File 5). We found absences of  
538 numerous conserved miRNA genes including *mir10a* and *mir196b*, hox miRNAs genes  
539 that were reported missing in the Gulf pipefish genome assembly (Small et al., 2016).  
540 Six of the additional highly conserved missing miRNAs belong to two miRNA clusters  
541 from the miR-130 family. These absences include *mir130a*, *mir301a*, *mir130b*, *mir301b*,  
542 *mir130c-2*, and *mir454b*. While *mir130a*, *mir301a*, and *mir301b* are convergently  
543 missing in platyfish (*X. maculatus*) and medaka (*O. latipes*), absences of *mir130b*,  
544 *mir130c-2*, and *mir454b* have not yet been reported in other vertebrate species (Figure  
545 S18) (Desvignes et al., 2019; Desvignes et al., 2021; Kelley et al., 2021). In some  
546 tetrapods and teleosts, *mir301a* is located in the first intron of *ska2*. The seadragons,  
547 Gulf and greater pipefishes, and tiger tail seahorse are missing *ska2* as well as *mir301a*  
548 and *mir130a*. Throughout vertebrates, *mir130b* and *mir301b* (and, in teleosts and  
549 Coelacanth, additionally *mir130c-2* and *mir454b*) are located in the intergenic region  
550 between *sdf2l1* and *top3b*. Though these adjacent protein coding genes and the  
551 immediate syntenic neighborhood are conserved in seadragons, Gulf and greater  
552 pipefishes, and tiger tail seahorse, this cluster of microRNAs is not.

553

554

## DISCUSSION

555        Exploring the seadragon genomes in a comparative phylogenetic context has lifted  
556 a veil on the evolution of seadragon-specific traits and has also revealed intriguing  
557 evolutionary facets of this unusual vertebrate family, the Syngnathidae, as a whole. We  
558 found that both leafy and weedy seadragon genomes stand out among their relatives in  
559 having a surprisingly large contingent of repetitive DNA. This pattern appears to have  
560 been driven largely by recent expansions of *BovB* and *Tc1*, and a yet-to-be-classified  
561 cluster of repetitive sequences specific to the seadragon lineage. One possible  
562 explanation for the large difference we observed between seadragon and *Syngnathus*  
563 pipefish repeatome size and genomic distribution could be a difference in historical  
564 effective population size ( $N_e$ ). In this case, negative selection to remove rapidly  
565 expanding repeats from a population would be less effective in the face of strong  
566 genetic drift (small  $N_e$ ) (Lynch, 2007; Lynch & Conery, 2003). Differences in k-mer-based  
567 heterozygosity estimates from individual WGS data are at least consistent with this  
568 idea. A heterozygosity estimate based on the Gulf pipefish data (Small et al., 2016) is  
569 roughly three times the seadragon estimates (1.01% versus 0.27% and 0.33% for leafy  
570 and weedy seadragons, respectively).

571        The explanation presented above for TE expansion assumes that deleterious  
572 effects are common, likely through interruption of coding regions or promoters, or by  
573 regional silencing via chromatin changes (Liu et al., 2018). However, TEs can also  
574 contribute new genes or gene regulatory sequences when a host genome co-opts  
575 (“domesticates”) these exogenous genetic elements (Bejerano et al., 2006). Some  
576 classes of TE provide, for example, binding sites for master transcriptional regulators  
577 NANOG and OCT4 throughout the mouse and human genomes but in largely non-  
578 overlapping sets of loci between the taxa, potentially restructuring, in lineage-specific



579 ways, the transcriptional networks for developmental pluripotency (Kunarso et al.,  
580 2010). TEs and repetitive DNA in general can fuel gene family expansion or contraction  
581 by precipitating unequal crossover events; Hahn et al. (2007) suggest an “explosion” of  
582 TEs in the primate lineage could be linked to its accelerated gene content evolution in  
583 primates. Repeatome expansion, such as what we here observe in seadragons, could  
584 have had disruptive impacts on gene regulatory networks and gene content, subject to  
585 subsequent evolution via negative or positive selection.

586 Using global and targeted approaches we explored expansion and contraction  
587 of gene families in seadragons and their relatives, and possible connections of gene  
588 content changes to observed TE distributions. Perhaps the most obvious trend we  
589 observed for the syngnathid lineage in general was contraction of particular immunity  
590 and detoxification pathway gene families, some of which have previously been  
591 described (Lin et al., 2016; Zhang et al., 2020). GTPase of the immunity-associated  
592 protein genes (GIMAP), for example, was among the contracted families in seadragons  
593 that was also detected in the seahorse genome (Lin et al., 2016), and our more  
594 comprehensive analysis supports that the GIMAP contraction occurred prior to the  
595 radiation of syngnathids. This family exists as a single eight-member cluster in  
596 mammals (Krucken et al., 2004). GIMAP genes have multiplied in other teleost lineages,  
597 numbering up to nearly 190 genes. Balla et al. (2020) found zebrafish GIMAP genes  
598 respond to pathogenic viral exposure and suggest the gene expansion could have been  
599 evolutionarily favored by the relatively long period that hatchlings must rely on innate  
600 immunity before the development of a functional adaptive immune system. Male-  
601 brooded syngnathid embryos might enjoy a luxury not available to free-spawned  
602 progeny like those of zebrafish, namely pathogen climate control afforded by the  
603 paternal immune system before their own adaptive immunity develops. The male’s

604 immune system strikes a balance of defending against foreign agents but without  
605 rejecting his own brood. The syngnathid contraction of the GIMAP family is also  
606 interesting, therefore, in light of the possibility that *gimap4*, which does persist in the  
607 lineage, could promote immunologic tolerance to embryos in brood pouch tissues (Roth  
608 et al., 2020). Roth et al. (2020) based this assertion on the observation that *gimap4* is  
609 up-regulated in *Syngnathus* pregnancy tissues, where it could contribute to local  
610 suppression of the lymphocyte population (Roth et al., 2020; Schnell et al., 2006).

611 We detected seadragon-specific copy number expansion of a coatamer  
612 complex gene *copb2*. Variants of the *BovB* and *Tc1* transposable elements were  
613 enriched surrounding the supernumerary gene copies, suggesting a TE-driven  
614 mechanism for the expansion. Copb2 forms part of a protein complex involved in  
615 retrograde vesicle budding from the Golgi apparatus and secretion of macromolecule  
616 cargo, such as collagen, which is critical for bone and connective tissue development.  
617 Mice and fish developing with deficits in *copb2* have delayed bone mineralization and  
618 low bone density, as well as defects in type II collagen trafficking and secretion (Marom  
619 et al., 2021). Zebrafish mutants of *copb2* develop mispatterned, kinked notochords with  
620 poorly formed vacuoles and a disorganized perinotochordal basement membrane,  
621 which is secreted by notochord sheath cells (Coutinho et al., 2004). In teleosts, the  
622 notochord, particularly its sheath, plays an instructive role in patterning the vertebrae  
623 (Gray et al., 2014; Peskin et al., 2020).

624 Given the elaborated bony exoskeleton in seadragons, their stiff bodies with  
625 connective tissue-dense leafy ornaments, and their kinked axial skeletons with varied  
626 and regionalized vertebral forms (Figure 1), the proliferation of *copb2* gene sequences  
627 in their genomes ignites curiosity about the possible evolutionary developmental  
628 consequences of this expansion for the seadragons' unique exo- and endoskeletons.

629 Kinked vertebral columns in the guppy (*Poecilia reticulata*) mutant *curveback* are  
630 characterized by wedge-shaped vertebrae (Gorman et al., 2007). Similar to the guppy  
631 mutant and to the developmental malformation of vertebrae in human Scheuermann's  
632 kyphosis sufferers, vertebrae are keystone-shaped in the weedy seadragon at locations  
633 of spinal curvature (Figure 1; Figure S2).

634         One of the most surprising gene family reductions we uncovered is shared by all  
635 of the syngnathid lineages we explored; it is the loss of *fgf3* and *fgf4*. Loss of these two  
636 fibroblast growth factor genes in syngnathids is striking because their orthologs in other  
637 vertebrates have long been hypothesized to play nearly indispensable pleiotropic  
638 developmental roles in the pharyngeal arches, teeth, brain, cranial placodes, epidermal  
639 appendages, limbs, and the segmental axis (Anderson et al., 2020; Boulet et al., 2004;  
640 Cooper et al., 2017; Cooper et al., 2018; Crump et al., 2004; David et al., 2002;  
641 Jackman et al., 2013; Leger & Brand, 2002; Lu et al., 2006; Maves et al., 2002; Miyake  
642 & Itoh, 2013; Nechiporuk & Raible, 2008; Prykhozhij & Neumann, 2008; Reuter et al.,  
643 2019; Walshe et al., 2002; Wang et al., 2007). It is reasonable to weigh whether losing  
644 these two multifunctional signaling ligands could have had significant and broad  
645 consequences to both deeply conserved developmental pathways and their  
646 morphological readouts. Another possibility is that these developmental pathways had  
647 diverged neutrally, or through changes in other pathway members, from anciently  
648 conserved functions along the syngnathid lineage, permitting genes that had once been  
649 critical to become expendable. It is nevertheless valuable to note that syngnathid fishes  
650 share peculiarities in many features from the constellation of vertebrate traits that *fgf3*  
651 and *fgf4* are known to help pattern.

652         Dermal integuments of syngnathid fishes are bony plates, and in several  
653 syngnathid lineages including the seadragons these have been elaborated to

654 magnificence, sometimes independently. A subset of these plates in seadragons bear  
655 blunted struts of bone that end in fleshy paddle-shaped ornaments, the “leaves” and  
656 “weeds” of the species featured in this report (Figure 1). Another percomorph clade, the  
657 pufferfishes, are adorned with bony spines likely evolved from elasmoid scales. Shono  
658 et al., (Shono et al., 2019), showed that *fgf3* (and *fgf1a*) are expressed in developing  
659 pufferfish dermal spines. Given this and a trove of other evidence for an FGF signaling  
660 role in the development and diversification of scales, spines, and denticles in ray-finned  
661 and chondrichthyan fishes (Albertson et al., 2018; Aman et al., 2018; Cooper et al.,  
662 2017; Cooper et al., 2018; Daane et al., 2016; Kim et al., 2019; Shono et al., 2019),  
663 absence of *fgf3* and *fgf4* in the often heavily armored, elaborately spined syngnathids  
664 clearly suggests that derived mechanisms for integumentary bone development are at  
665 play in this lineage.

666         Syngnathids have evolved elongated faces with an unusual hyoid apparatus  
667 integral to specialized suction feeding (Figure 1) (Leysen et al., 2010), and they are  
668 toothless. These craniofacial features arise developmentally from complex interactions  
669 between - at least - endoderm, mesoderm, and neural crest components. Both *fgf3* and  
670 *fgf4* are expressed in the pharyngeal arches, which form skeletal elements of the jaw,  
671 hyoid, and, in fish, the gill supports (David et al., 2002; Herzog et al., 2004; Niswander &  
672 Martin, 1992) *fgf3* plays an essential role in craniofacial development. When *fgf3* is  
673 knocked out in zebrafish, mutants die within 7-9 days; craniofacial defects (particularly  
674 the full loss of cartilage in gill arches) are predicted to be the cause of their early  
675 mortality (Herzog et al., 2004). Additionally, when *fgf3* expression is disrupted in the  
676 mesendoderm in developing zebrafish, an “inverted” backward directed ceratohyal  
677 cartilage is formed (David et al., 2002). It is tempting to speculate that evolutionary loss  
678 of these genes could have led to altered craniofacial architecture of the elongated

679 syngnathid face, either directly or through the effects of genetic compensation

680 percolating through this signaling pathway.

681         Syngnathid toothlessness is also particularly interesting given *fgf3* and *fgf4*  
682 expression in zebrafish dental epithelium and their suspected roles in tooth  
683 morphogenesis (Jackman et al., 2004). Gilbert et al. (2019) propose a model for  
684 patterning of dentition in ray-finned fishes in which a tooth primordium acts as an  
685 organizer that induces the development of subsequent teeth, likely via secretion of Fgf3  
686 and Fgf4. Other tooth developmental genes are known to be lost or reduced in copy  
687 number in syngnathids, including *eve1* (Small et al., 2016); see above) and P/Q-rich  
688 SCPP enamel/enameloid matrix genes (Lin et al., 2016; Qu et al., 2021; Zhang et al.,  
689 2020). These losses imply an erosion of tooth development pathways spanning  
690 induction to mineralization, with our discovery of *fgf3/4* loss enlarging the pool of  
691 candidate causative genes for edentulism in syngnathids.

692         The syngnathid central nervous system features its own peculiarities. Benedetti  
693 (1991) described greater pipefish (*S. acus*) and long-snouted seahorse (*Hippocampus*  
694 *guttulatus*) to have highly modified or no discernable Mauthner neurons, the large,  
695 rhombomere 4 (r4) reticulospinal neurons critical for the rapid “C-start” escape  
696 response in many fishes and some amphibians (reviewed in Korn & Faber, 2005).  
697 Syngnathids are reputed also to lack mechanosensory lateral line neuromasts, from  
698 which the Mauthner cells receive synaptic inputs (Benedetti, 1991; Korn & Faber, 1975).  
699 In zebrafish, joint impairment of *fgf3* and *fgf8* impacts segmental identity of  
700 rhombomeres 3 and 5 and their reticulospinal neurons (Maves et al., 2002; Walshe et  
701 al., 2002). Furthermore, depletion of *fgf3* and *fgf10* reduced the number of zebrafish  
702 posterior lateral line neuromasts and inhibited migration of the placode down the length  
703 of the body (Nechiporuk & Raible, 2008). These observations present a compelling case

704 for future interrogation of a link between *fgf3* loss and derived hindbrain and sensory  
705 development in syngnathids.

706        Though it is known that paralogous FGF ligands can compensate for one another  
707 in some experimental contexts (Maves et al., 2002; Walshe et al., 2002), in general, we  
708 did not find sweeping evidence for adaptive evolution of paralogous FGF proteins or  
709 their receptors in the wake of syngnathid *fgf3* and *fgf4* gene losses. Correlated changes  
710 could instead have included evolution of non-coding, regulatory sequences of  
711 FGF/FGFR genes or changes to other gene families that interact with FGF signaling.  
712 Syngnathids, we found, have lost six deeply conserved miRNAs in the miR-130 family.  
713 Biological implications for these missing miRNA genes are uncertain, though it is  
714 possible that their losses could relate to derived syngnathid-specific traits and gene  
715 pathway changes. For instance, angiogenesis and tissue remodeling are critical  
716 components in syngnathid male pregnancy tissues (Stolting & Wilson, 2007), and  
717 *mir130a* is connected to vascular repatterning in mammals and teleosts (Chen & Gorski,  
718 2008; Singh et al., 2017) *mir130* genes are also known to affect FGF signaling. In  
719 chicken, knockdowns of *mir130* lead to increased expression of *fgf8* and FGF pathway  
720 member, *Erk 1/2* (Bobbs et al., 2012; Lopez-Sanchez et al., 2015). There is also a  
721 suspected regulatory relationship between FGF receptors and these miRNAs; in human  
722 differentiating stem cells, nuclear located FGFR1, nFGFR1, binds to the promoters of  
723 *mir301b* and *mir130b* (Stachowiak & Stachowiak, 2016; Terranova et al., 2015). Loss of  
724 miRNAs that regulate and are potentially regulated by FGFs and FGFRs could indicate  
725 a further extension of the derived restructuring of FGF signaling pathways in  
726 syngnathids.

727        Evidence for positive selection as a compensatory consequence of having lost  
728 *fgf3* and *fgf4* in a syngnathid ancestor proved to be scarce. *fgf16*, however, provides a

729 possible example of a separate evolutionary scenario: derived functional change in the  
730 seadragon lineage, at both the protein and cis-regulatory levels. Leafy and weedy  
731 seadragon *fgf16* proteins share an unusual deletion in a deeply conserved motif, and  
732 the seadragon gene also appears to have lost a 5' non-coding sequence that is  
733 otherwise conserved among syngnathids and distantly related percomorphs. In  
734 zebrafish, this gene is necessary for outgrowth of the pectoral fin, upstream of *fgf4* and  
735 *fgf8* (Nomura et al., 2006), and we show it is expressed similarly in fin margins in a  
736 representative percomorph, threespine stickleback (Figure S19) (*Gasterosteus*  
737 *aculeatus*). The eponymous “leaves” of seadragons that are fleshy extensions borne on  
738 bony supports extending from the dermal plates, are apparently stiffened by a core of  
739 collagenous tissue rather than ossified structures such as fin rays (Figure 1). Homology  
740 of the leafy ornaments with fins might pertain only at the level of shared genetic  
741 pathways, such as in the case of a cooption or re-deployment of FGF-signaling to elicit  
742 proliferation and outgrowth of these superficially fin-like structures. A role in scale or  
743 dermal plate patterning for *fgf16* is not known from teleosts, though in birds the  
744 orthologous gene, potentially acting with *fgfr1*, can suppress both *shh* expression and  
745 downy feather elongation when locally overexpressed (Chen et al., 2016). The  
746 seadragon-specific changes in a known AER and integument-patterning gene are  
747 intriguing in the context of this morphological oddity, the leafy “appendages”. The  
748 seahorse *fgf16* protein, we found, bears substitutions in the same amino acid motif  
749 deleted in seadragons. The fact that two lineages that have evolved elaborate bony and  
750 fleshy ornaments (seadragons and seahorses) both show divergence in a deeply  
751 conserved motif of this gene is tantalizing and warrants further comparative work.

752

753

## SUMMARY

754           The genome models of the leafy and weedy seadragon provide a first step  
755 towards unlocking how the fantastical forms of these animals and their close relatives  
756 have evolved. Even with our preliminary analyses we have identified likely recent  
757 expansions of transposable elements, with hypothesized involvement in significant  
758 changes to gene families of known consequence, the most surprising being the loss of  
759 *fgf3* and *fgf4* in the syngnathid lineage. Repetitive DNA, including that generated by the  
760 activity of TEs, can precipitate genomic rearrangements such as deletions, duplications,  
761 and inversions (reviewed in Bourque et al., 2018; Schrader & Schmitz, 2019). It is  
762 therefore likely that historical and possibly continuing TE activity in genomes of the  
763 syngnathid lineage has resulted in alterations to genome structure and content, with  
764 extreme consequences for developmental genetic programs that are otherwise deeply  
765 conserved across vertebrates.

766

767

## ACKNOWLEDGEMENTS

768 We are truly grateful for the dedicated efforts of L. Matsushige and the seadragon  
769 husbandry staff of the Birch Aquarium at Scripps, who preserved *P. eques* samples  
770 crucial for this work. We also thank the Tennessee Aquarium, and particularly Aquarist  
771 K. Hurt for generous sharing of *P. taeniolatus* samples. We are indebted to M.  
772 Weitzman and D. Turnbull from the UO GC3F for critical assistance with library  
773 preparation and sequencing. We would like to acknowledge staff at Carl Zeiss  
774 Microscopy, LLC, particularly J. Mancuso, A. Browning, K. Skinner, and R. White for  
775 collaborating to scan the Gulf pipefish in Figure S2. We are grateful for T. Desvignes for  
776 guidance on the miRNA annotations. We especially thank C. Kimmel for his helpful  
777 comments on the manuscript. This work was funded by National Institutes of Health  
778 grants RR032670 and P50GM098911 (to WAC), National Science Foundation grant  
779 OPP-2015301 (to WAC, SB, and CMS), and Oregon Research Excellence Funds (to  
780 WAC). HMH was supported by the Genetics Training Program (NIH T32GM007413) at  
781 UO. Purchase of the Zeiss Xradia 620 Versa at the University of Oregon was made  
782 possible with funding support from the M.J. Murdock Charitable Trust Grant SR-  
783 201812008 (to WAC).

784

785

## CONFLICTS OF INTEREST

786 The authors declare no conflicts of interest.



787  
788  
789  
790  
791  
792  
793  
794  
795  
796  
797  
798

**Data Accessibility:** All raw sequencing data associated with this study will be available upon peer-reviewed publication via the NCBI Sequencing Read Archive (SRA), under BioProjects PRJNA765699 and PRJNA765702. Annotation and summary files not in the Supplementary Information will be available upon peer-reviewed publication in the Dryad repository.

## FIGURES

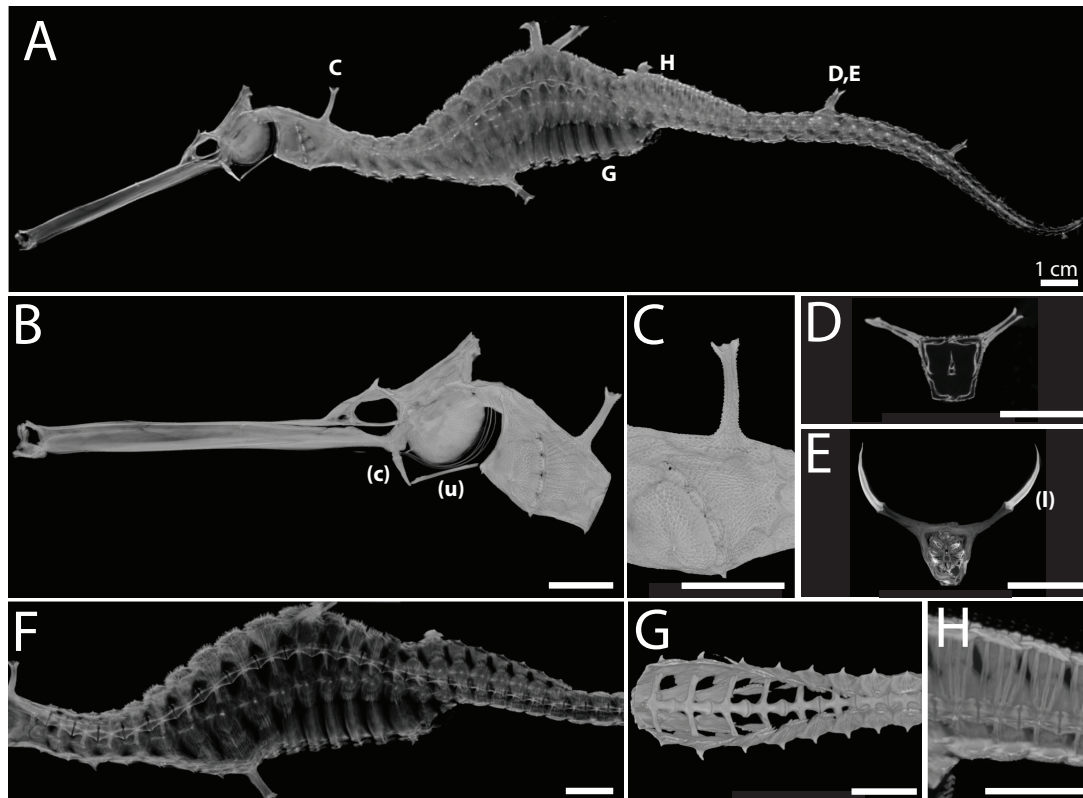

800  
801  
802  
803  
804  
805  
806  
807  
808  
809  
810  
811  
812

**Figure 1.** The anatomy of the weedy seadragon includes remarkably elongated facial features terminating in toothless, upturned jaws, an unusual hyoid apparatus specialized for suction feeding, a bony exoskeleton with elaborate spines that support fleshy “leaves”, and a sinusoidal spine of rib-less vertebrae that vary in shape and size. A) a lateral view of the skeleton of *Phyllopteryx taeniolatus* reconstructed by X-ray microscopy. B) detail of the head (the ceratohyal, c, and urohyal, u, of the hyoid apparatus are noted). C) Detail of the pectoral region (lateral view) showing a dorsal, unpaired “leafy” appendage support surrounded by other dermal plates with much shorter spines. D) optical cross section of the tail through a pair of leafy appendage spines. E) optical cross section through the same appendages as in D) but with a contrast agent that reveals the fleshy leaves, seen edge on (denoted by l). F) lateral view shows keystone-shaped vertebrae at curvatures - both kyphosis and lordosis - of the

813 spine. G) ventral view of the rib-less abdominal vertebrae. H) a lateral detail of the  
 814 specialized vertebrae beneath the propulsive dorsal fin.  
 815  
 816  
 817

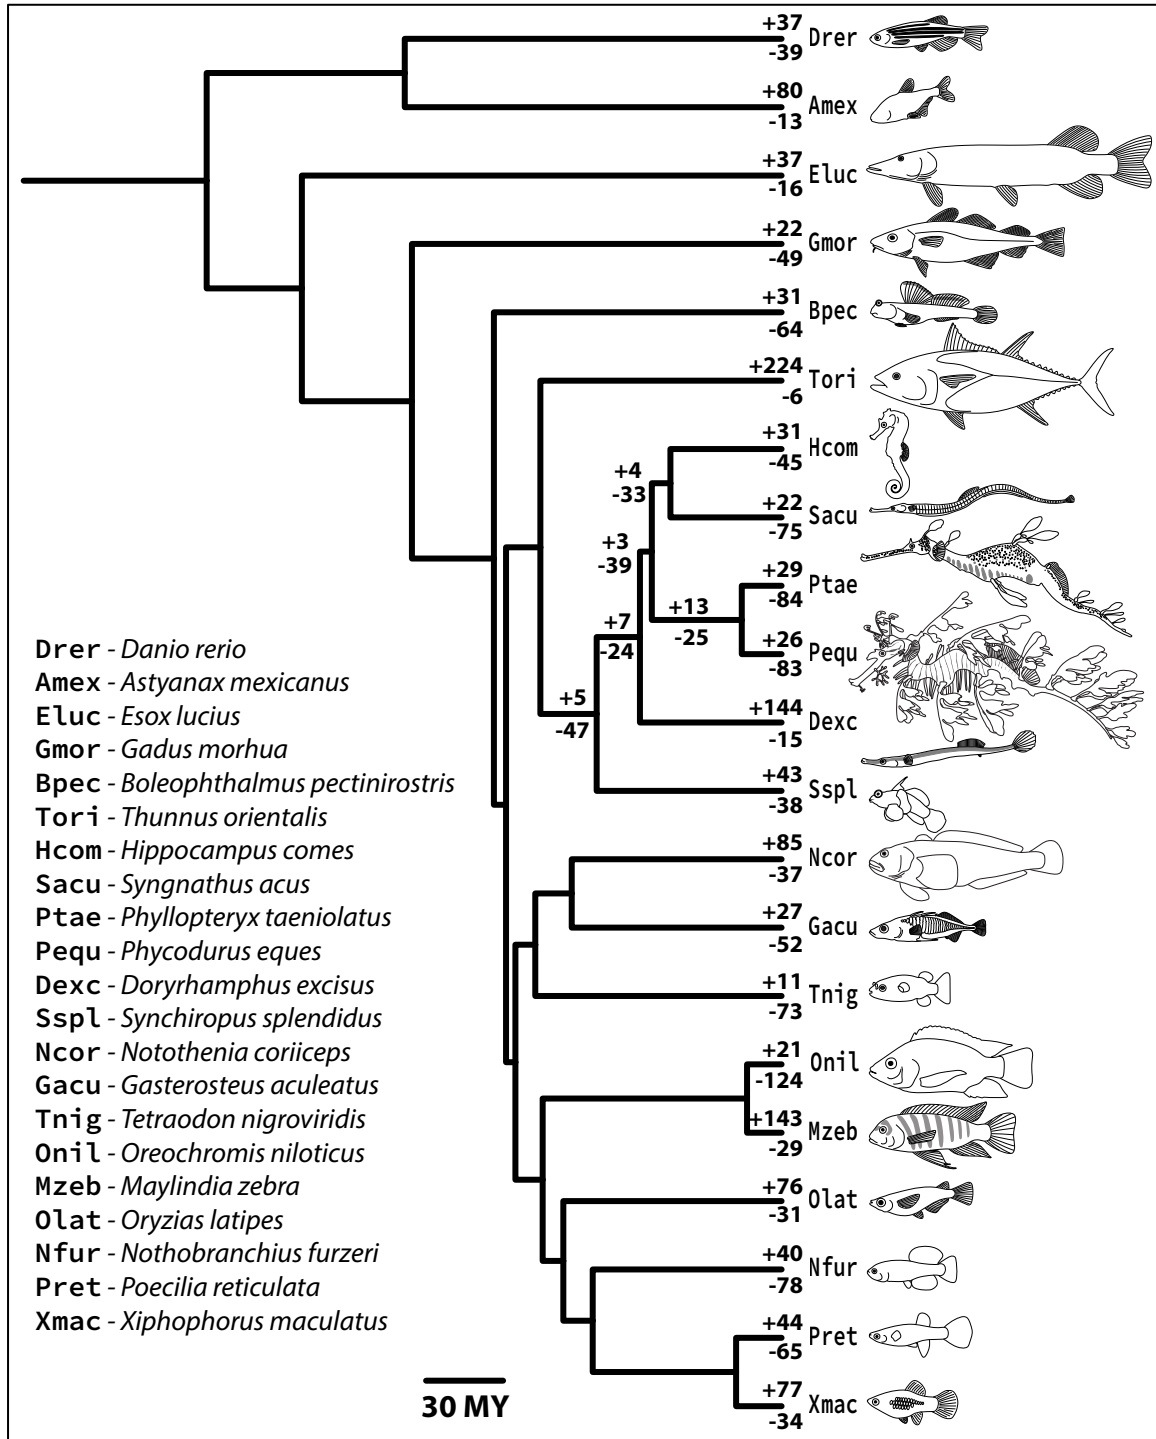

818  
 820 **Figure 2.** Genomes of 21 teleost species provide phylogenetic context for gene family  
 821 evolution in seadragons and syngnathid fishes. Represented are evolutionary

822 relationships among a sample of morphologically diverse teleosts, according to a time-  
 823 calibrated phylogenetic tree adapted from Rabosky et al. (2018). We used published  
 824 and newly generated protein-coding gene annotations for the species pictured here to  
 825 understand putative gene family expansions and contractions in lineages of interest,  
 826 specifically the seadragons. The number of gene families with statistical evidence for  
 827 expansion (top values) and contraction (bottom values) along all terminal branches and  
 828 internal syngnathiform branches are shown. Note that the four-letter species symbols in  
 829 the legend are used throughout this article.  
 830  
 831  
 832

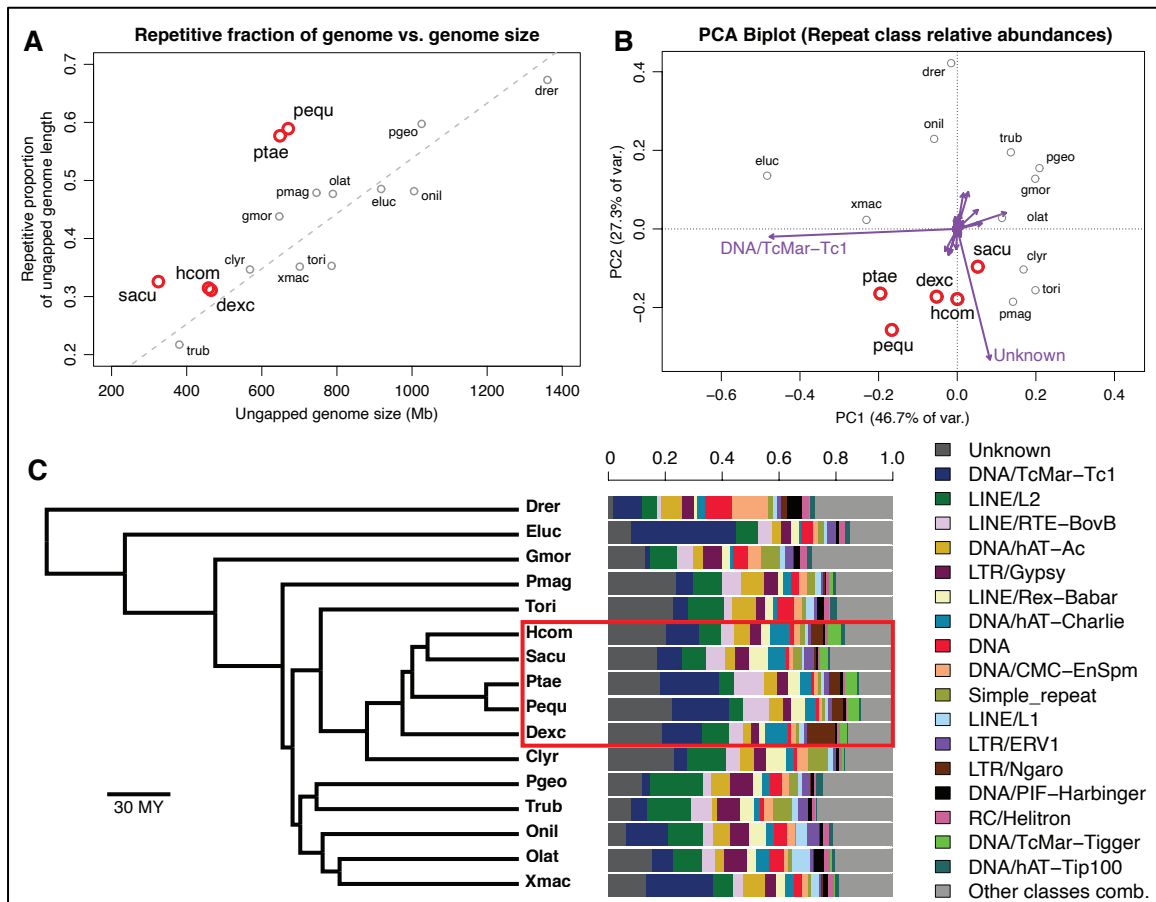

833  
 834  
 835 **Figure 3.** Seadragon genomes demonstrate a large fraction of repetitive DNA relative to  
 836 other teleost fishes, characterized by substantial contributions from TcMar-Tc1  
 837 transposons and unclassified constituents. A) Scatterplot showing the strong, positive  
 838 relationship between genome assembly size (x-axis) and the proportion of the genome  
 839 annotated as repetitive for 16 recent teleost genome assemblies. Note that seadragon  
 840 genomes (pequ and ptae) are especially repetitive (~60%) given their relatively small  
 841 size (~650 Mb). Dashed line shows a phylogenetic generalized least squares (PGLS)  
 842 regression fit, and syngnathid genomes are in red. B) A Principal Components Analysis  
 843 (PCA) biplot shows similarity of the 16 genomes based on relative frequencies of repeat  
 844 classes. TcMar-Tc1 and “Unknown” repeat classes load especially heavily on PC1 and  
 845 PC2, respectively, as indicated by vectors (purple arrows) drawn in the space, and  
 846 these contribute to the distinctiveness of syngnathid genomes (in red). C) Barplots

847 showing the relative abundances of repeat classes across the 16 genomes, ordered  
848 (from left to right, and top to bottom in the legend) from highest to lowest mean relative  
849 abundance. Phylogenetic relationships among the 16 species are presented as a time-  
850 calibrated tree from Rabosky et al. (2018) and the syngnathid clade is indicated by a red  
851 rectangle.  
852  
853  
854

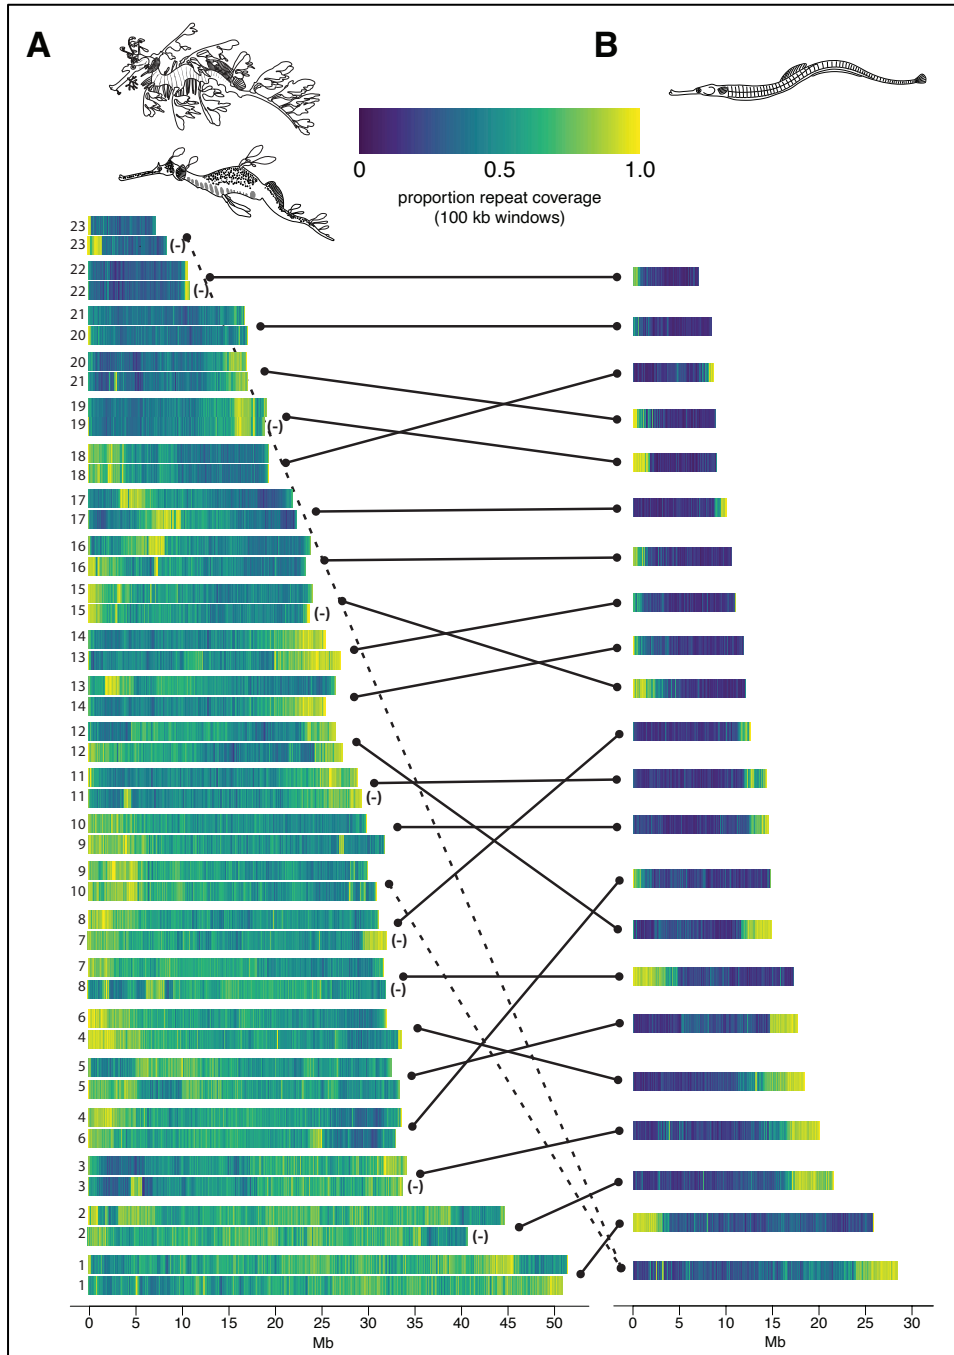

855  
857  
858

**Figure 4.** Leafy and weedy seadragon chromosomes are densely and non-uniformly populated by repetitive DNA. A) Orthologous pairs of the 23 seadragon chromosomes,

859 ordered ascending from shortest to longest leafy seadragon sequence. For each pair  
 860 the leafy seadragon chromosome is on top, and the weedy seadragon ortholog is  
 861 below. Cases in which the orientation of the weedy seadragon chromosome has been  
 862 reversed to align with the leafy ortholog are denoted by “(-)”. B) Chromosome models of  
 863 the greater pipefish (*Syngnathus acus*), also ascending from shortest to longest. Lines  
 864 connect seadragon and pipefish chromosomes with large regions of orthology, as  
 865 inferred via conserved synteny analysis. Dashed lines reflect the fusion of two ancestral  
 866 syngnathid chromosomes that is derived in the lineage leading to *Syngnathus* and  
 867 *Hippocampus*. Overall repeat basepair occupation of 100 kb windows (expressed as a  
 868 proportion) is presented as a heatmap.  
 869  
 870  
 871

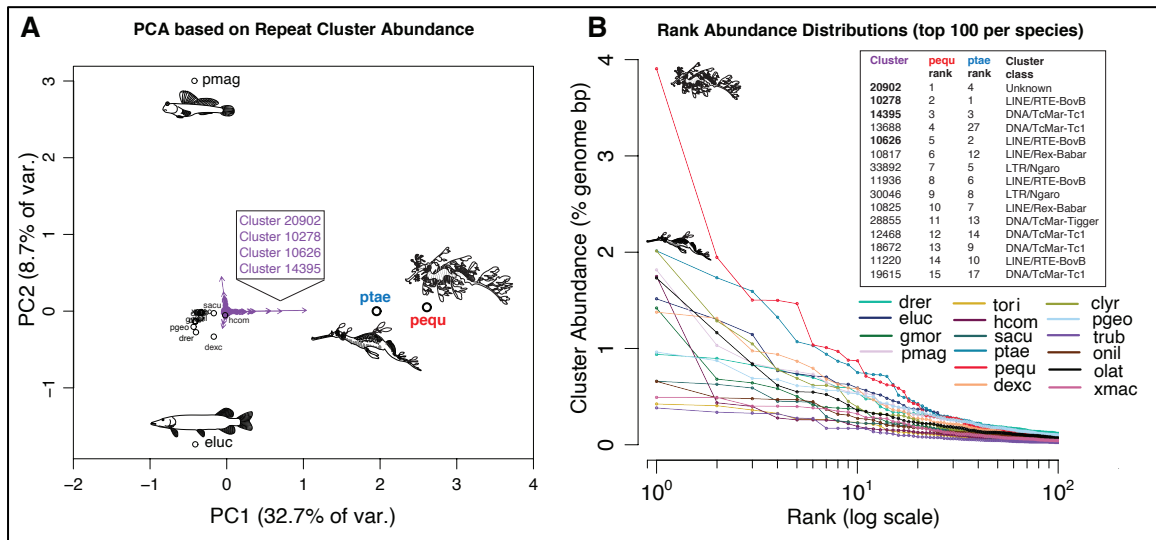

872  
 873 **Figure 5.** Relatively recent repeat expansions in the seadragon lineage drive the  
 874 uniqueness of seadragon repeatomes. Repeat clusters defined at the 80% sequence  
 875 identity level and quantified by the proportion of total genome length they occupy were  
 876 used to conduct principal components analysis (PCA). A) A bi-plot of the first two PCA  
 877 axes, showing extreme separation of seadragons from the other 14 species in  
 878 repeatome space, particularly along the leading axis of variation (x-axis). Purple arrows  
 879 represent individual repeat clusters, and how strongly (and in what direction) they  
 880 influence the position of genomes in this repeatome space. Four repeat clusters (shown  
 881 in a box) with especially large loadings on PC1 are strongly associated with seadragon  
 882 repeatome uniqueness. B) Rank abundance distributions for the top 100 repeat clusters  
 883 in each of the 16 species included in the repeat analysis. The top 20 clusters for each  
 884 seadragon species are consistently elevated in abundance, relative to corresponding  
 885 ranks in the other 14 fish genomes. Shown in a box are the top 15 leafy seadragon  
 886 clusters, their ranks in weedy seadragon, and the repeat class to which they likely  
 887 belong. Note that the top 3 (and 5<sup>th</sup>) clusters in the list correspond to the boxed clusters  
 888 in panel A.  
 889  
 890  
 891  
 892

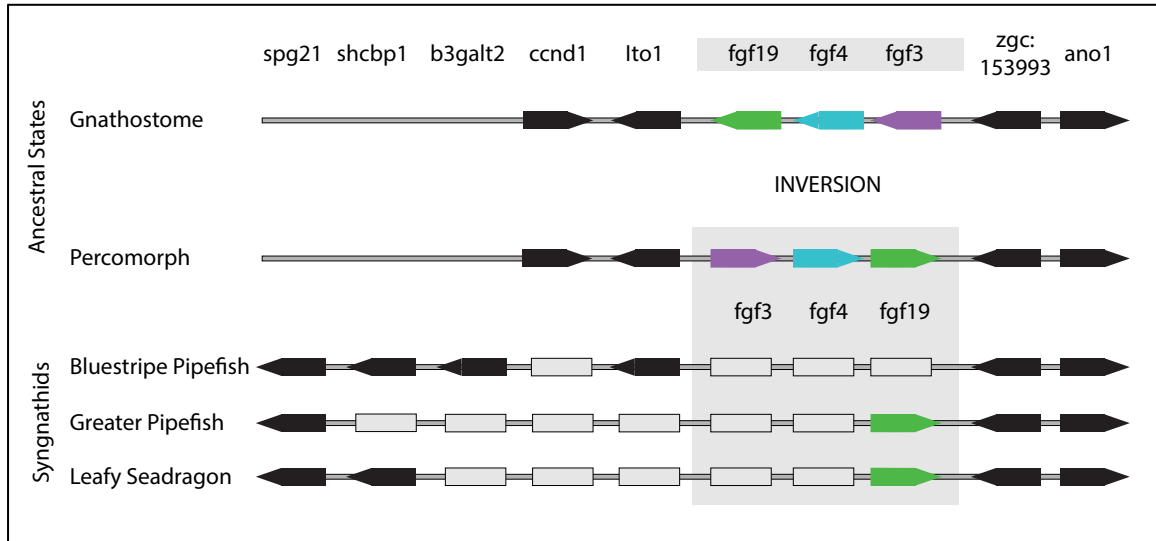

892

895 **Figure 6.** The *fgf3/4/19* cluster locus has experienced surprising gene losses in the  
 896 syngnathid lineage. While retaining the same immediate gene neighbors, the FGF  
 897 cluster became inverted in the percomorph fishes relative to outgroups like zebrafish  
 898 and tetrapods. Several genes (grey rectangles) appear to have been deleted from the  
 899 locus in the syngnathids, though not all of the losses are shared. *spg21*, *shcbp1*, and  
 900 *b3galt2*, which neighbor the locus in the syngnathid lineage, are separated from the  
 901 FGF cluster by other genes in non-syngnathid percomorphs like platyfish. Genes that  
 902 appear lost from the locus cannot be found anywhere else in the genome assemblies of  
 903 pipefishes, seahorses or seadragons. Arrows show gene order and orientation; grey  
 904 rectangles represent apparent gene losses.

905

906

907

## REFERENCES

- 908  
909  
910  
911 Abramyan, J. (2015). Lineage-specific loss of FGF17 within the avian orders Galliformes  
912 and Passeriformes. *Gene*, 563(2), 180-189.  
913 <https://doi.org/10.1016/j.gene.2015.03.027>
- 914 Albertson, R. C., Kawasaki, K. C., Tetrault, E. R., & Powder, K. E. (2018). Genetic  
915 analyses in Lake Malawi cichlids identify new roles for Fgf signaling in scale  
916 shape variation. *Commun Biol*, 1, 55. <https://doi.org/10.1038/s42003-018-0060-4>
- 917 Altschul, S. F., Gish, W., Miller, W., Myers, E. W., & Lipman, D. J. (1990). Basic local  
918 alignment search tool. *J Mol Biol*, 215(3), 403-410.  
919 [https://doi.org/10.1016/S0022-2836\(05\)80360-2](https://doi.org/10.1016/S0022-2836(05)80360-2)
- 920 Aman, A. J., Fulbright, A. N., & Parichy, D. M. (2018). Wnt/beta-catenin regulates an  
921 ancient signaling network during zebrafish scale development. *Elife*, 7.  
922 <https://doi.org/10.7554/eLife.37001>
- 923 Anderson, M. J., Magidson, V., Kageyama, R., & Lewandoski, M. (2020). Fgf4 maintains  
924 Hes7 levels critical for normal somite segmentation clock function. *Elife*, 9.  
925 <https://doi.org/10.7554/eLife.55608>
- 926 Balla, K. M., Rice, M. C., Gagnon, J. A., & Elde, N. C. (2020). Linking virus discovery to  
927 immune responses visualized during zebrafish infections. *Curr Biol*, 30(11),  
928 2092-2103 e2095. <https://doi.org/10.1016/j.cub.2020.04.031>
- 929 Bejerano, G., Lowe, C. B., Ahituv, N., King, B., Siepel, A., Salama, S. R., Rubin, E. M.,  
930 Kent, W. J., & Haussler, D. (2006). A distal enhancer and an ultraconserved exon  
931 are derived from a novel retroposon. *Nature*, 441(7089), 87-90.  
932 <https://doi.org/10.1038/nature04696>
- 933 Benedetti. (1991). Mauthner neurons in syngnathid bony fish.
- 934 Bizuayehu, T. T., & Babiak, I. (2014). MicroRNA in teleost fish. *Genome Biol Evol*, 6(8),  
935 1911-1937. <https://doi.org/10.1093/gbe/evu151>
- 936 Bobbs, A. S., Saarela, A. V., Yatskievych, T. A., & Antin, P. B. (2012). Fibroblast growth  
937 factor (FGF) signaling during gastrulation negatively modulates the abundance of  
938 microRNAs that regulate proteins required for cell migration and embryo  
939 patterning. *J Biol Chem*, 287(46), 38505-38514.  
940 <https://doi.org/10.1074/jbc.M112.400598>
- 941 Boudinot, P., van der Aa, L. M., Jouneau, L., Du Pasquier, L., Pontarotti, P., Briolat, V.,  
942 Benmansour, A., & Levraud, J. P. (2011). Origin and evolution of TRIM proteins:  
943 new insights from the complete TRIM repertoire of zebrafish and pufferfish. *PLoS*  
944 *ONE*, 6(7), e22022. <https://doi.org/10.1371/journal.pone.0022022>
- 945 Boulet, A. M., Moon, A. M., Arenkiel, B. R., & Capecchi, M. R. (2004). The roles of Fgf4  
946 and Fgf8 in limb bud initiation and outgrowth. *Dev Biol*, 273(2), 361-372.  
947 <https://doi.org/10.1016/j.ydbio.2004.06.012>
- 948 Bourque, G., Burns, K. H., Gehring, M., Gorbunova, V., Seluanov, A., Hammell, M.,  
949 Imbeault, M., Izsvak, Z., Levin, H. L., Macfarlan, T. S., Mager, D. L., & Feschotte,

- 950 C. (2018). Ten things you should know about transposable elements. *Genome*  
951 *Biol*, 19(1), 199. <https://doi.org/10.1186/s13059-018-1577-z>
- 952 Bruna, T., Hoff, K. J., Lomsadze, A., Stanke, M., & Borodovsky, M. (2021). BRAKER2:  
953 automatic eukaryotic genome annotation with GeneMark-EP+ and AUGUSTUS  
954 supported by a protein database. *NAR Genom Bioinform*, 3(1), lqaa108.  
955 <https://doi.org/10.1093/nargab/lqaa108>
- 956 Bushnell, B. (2014). BBMap: A fast, accurate, splice-aware aligner.  
957 [sourceforge.net/projects/bbmap/](https://sourceforge.net/projects/bbmap/).
- 958 Canestro, C., Yokoi, H., & Postlethwait, J. H. (2007). Evolutionary developmental biology  
959 and genomics. *Nat Rev Genet*, 8(12), 932-942. <https://doi.org/10.1038/nrg2226>
- 960 Catchen, J., Hohenlohe, P. A., Bassham, S., Amores, A., & Cresko, W. A. (2013).  
961 Stacks: an analysis tool set for population genomics. *Mol Ecol*, 22(11), 3124-  
962 3140. <https://doi.org/10.1111/mec.12354>
- 963 Catchen, J. M., Amores, A., Hohenlohe, P., Cresko, W., & Postlethwait, J. H. (2011).  
964 Stacks: building and genotyping Loci de novo from short-read sequences. *G3*  
965 (*Bethesda*), 1(3), 171-182. <https://doi.org/10.1534/g3.111.000240>
- 966 Catchen, J. M., Conery, J. S., & Postlethwait, J. H. (2009). Automated identification of  
967 conserved synteny after whole-genome duplication. *Genome Res*, 19(8), 1497-  
968 1505. <https://doi.org/10.1101/gr.090480.108>
- 969 Chang, M. X., Xiong, F., Wu, X. M., & Hu, Y. W. (2021). The expanding and function of  
970 NLRC3 or NLRC3-like in teleost fish: Recent advances and novel insights. *Dev*  
971 *Comp Immunol*, 114, 103859. <https://doi.org/10.1016/j.dci.2020.103859>
- 972 Chen, C. K., Ng, C. S., Wu, S. M., Chen, J. J., Cheng, P. L., Wu, P., Lu, M. Y., Chen, D.  
973 R., Chuong, C. M., Cheng, H. C., Ting, C. T., & Li, W. H. (2016). Regulatory  
974 differences in natal down development between altricial zebra finch and precocial  
975 chicken. *Molecular Biology and Evolution*, 33(8), 2030-2043.  
976 <https://doi.org/10.1093/molbev/msw085>
- 977 Chen, Y., & Gorski, D. H. (2008). Regulation of angiogenesis through a microRNA (miR-  
978 130a) that down-regulates antiangiogenic homeobox genes GAX and HOXA5.  
979 *Blood*, 111(3), 1217-1226. <https://doi.org/10.1182/blood-2007-07-104133>
- 980 Chin, C. S., Alexander, D. H., Marks, P., Klammer, A. A., Drake, J., Heiner, C., Clum, A.,  
981 Copeland, A., Huddleston, J., Eichler, E. E., Turner, S. W., & Korlach, J. (2013).  
982 Nonhybrid, finished microbial genome assemblies from long-read SMRT  
983 sequencing data. *Nat Methods*, 10(6), 563-569.  
984 <https://doi.org/10.1038/nmeth.2474>
- 985 Choi, Y., & Chan, A. P. (2015). PROVEAN web server: a tool to predict the functional  
986 effect of amino acid substitutions and indels. *Bioinformatics*, 31(16), 2745-2747.  
987 <https://doi.org/10.1093/bioinformatics/btv195>
- 988 Connolly, R., Melville, A., & Keesing, J. (2002). Abundance, movement and individual  
989 identification of leafy seadragons, *Phycodurus eques* (Pisces: Syngnathidae).  
990 *Marine and Freshwater Research*, 53, 777-780.



- 991 Cooper, R. L., Martin, K. J., Rasch, L. J., & Fraser, G. J. (2017). Developing an ancient  
992 epithelial appendage: FGF signalling regulates early tail denticle formation in  
993 sharks. *Evodevo*, 8, 8. <https://doi.org/10.1186/s13227-017-0071-0>
- 994 Cooper, R. L., Thiery, A. P., Fletcher, A. G., Delbarre, D. J., Rasch, L. J., & Fraser, G. J.  
995 (2018). An ancient Turing-like patterning mechanism regulates skin denticle  
996 development in sharks. *Sci Adv*, 4(11), eaau5484.  
997 <https://doi.org/10.1126/sciadv.aau5484>
- 998 Coutinho, P., Parsons, M. J., Thomas, K. A., Hirst, E. M., Saude, L., Campos, I.,  
999 Williams, P. H., & Stemple, D. L. (2004). Differential requirements for COPI  
1000 transport during vertebrate early development. *Dev Cell*, 7(4), 547-558.  
1001 <https://doi.org/10.1016/j.devcel.2004.07.020>
- 1002 Crump, J. G., Maves, L., Lawson, N. D., Weinstein, B. M., & Kimmel, C. B. (2004). An  
1003 essential role for Fgfs in endodermal pouch formation influences later craniofacial  
1004 skeletal patterning. *Development*, 131(22), 5703-5716.  
1005 <https://doi.org/10.1242/dev.01444>
- 1006 Daane, J. M., Rohner, N., Konstantinidis, P., Djuranovic, S., & Harris, M. P. (2016).  
1007 Parallelism and epistasis in skeletal evolution identified through use of  
1008 phylogenomic mapping strategies. *Molecular Biology and Evolution*, 33(1), 162-  
1009 173. <https://doi.org/10.1093/molbev/msv208>
- 1010 David, N. B., Saint-Etienne, L., Tsang, M., Schilling, T. F., & Rosa, F. M. (2002).  
1011 Requirement for endoderm and FGF3 in ventral head skeleton formation.  
1012 *Development*, 129(19), 4457-4468. <https://doi.org/10.1242/dev.129.19.4457>
- 1013 Dawson, C. E. (1985). *Indo-Pacific pipefishes (Red Sea to the Americas)*. Gulf Coast  
1014 Research Laboratory.
- 1015 Desvignes, T., Batzel, P., Sydes, J., Eames, B. F., & Postlethwait, J. H. (2019). miRNA  
1016 analysis with Prost! reveals evolutionary conservation of organ-enriched  
1017 expression and post-transcriptional modifications in three-spined stickleback and  
1018 zebrafish. *Sci Rep*, 9(1), 3913. <https://doi.org/10.1038/s41598-019-40361-8>
- 1019 Desvignes, T., Sydes, J., Montfort, J., Bobe, J., & Postlethwait, J. H. (2021). Evolution  
1020 after whole-genome duplication: teleost microRNAs. *Molecular Biology and  
1021 Evolution*, 38(8), 3308-3331. <https://doi.org/10.1093/molbev/msab105>
- 1022 Dobin, A., Davis, C. A., Schlesinger, F., Drenkow, J., Zaleski, C., Jha, S., Batut, P.,  
1023 Chaisson, M., & Gingeras, T. R. (2013). STAR: ultrafast universal RNA-seq  
1024 aligner. *Bioinformatics*, 29(1), 15-21.  
1025 <https://doi.org/10.1093/bioinformatics/bts635>
- 1026 Dudchenko, O., Batra, S. S., Omer, A. D., Nyquist, S. K., Hoeger, M., Durand, N. C.,  
1027 Shamim, M. S., Machol, I., Lander, E. S., Aiden, A. P., & Aiden, E. L. (2017). De  
1028 novo assembly of the *Aedes aegypti* genome using Hi-C yields chromosome-  
1029 length scaffolds. *Science*, 356(6333), 92-95.  
1030 <https://doi.org/10.1126/science.aal3327>
- 1031 Dudchenko, O., Shamim, M. S., Batra, S. S., Durand, N. C., Musial, N. T., Mostofa, R.,  
1032 Pham, M., Glenn St Hilaire, B., Yao, W., Stamenova, E., Hoeger, M., Nyquist, S.  
1033 K., Korchina, V., Pletch, K., Flanagan, J. P., Tomaszewicz, A., McAloose, D.,  
1034 Pérez Estrada, C., Novak, B. J., Omer, A. D., & Aiden, E. L. (2018). The

- 1035 Juicebox Assembly Tools module facilitates *de novo* assembly of mammalian  
1036 genomes with chromosome-length scaffolds for under \$1000. *bioRxiv*. <Go to  
1037 WoS>://WOS:000255412600014
- 1038 Durand, N. C., Robinson, J. T., Shamim, M. S., Machol, I., Mesirov, J. P., Lander, E. S.,  
1039 & Aiden, E. L. (2016). Juicebox provides a visualization system for Hi-C contact  
1040 maps with unlimited zoom. *Cell Syst*, 3(1), 99-101.  
1041 <https://doi.org/10.1016/j.cels.2015.07.012>
- 1042 Edgar, R. C. (2010). Search and clustering orders of magnitude faster than BLAST.  
1043 *Bioinformatics*, 26(19), 2460-2461. <https://doi.org/10.1093/bioinformatics/btq461>
- 1044 Enright, A. J., Van Dongen, S., & Ouzounis, C. A. (2002). An efficient algorithm for large-  
1045 scale detection of protein families. *Nucleic Acids Res*, 30(7), 1575-1584.  
1046 <https://doi.org/10.1093/nar/30.7.1575>
- 1047 Flynn, J. M., Hubley, R., Goubert, C., Rosen, J., Clark, A. G., Feschotte, C., & Smit, A.  
1048 F. (2020). RepeatModeler2 for automated genomic discovery of transposable  
1049 element families. *Proc Natl Acad Sci U S A*, 117(17), 9451-9457.  
1050 <https://doi.org/10.1073/pnas.1921046117>
- 1051 Gao, B., Chen, W., Shen, D., Wang, S., Chen, C., Zhang, L., Wang, W., Wang, X., &  
1052 Song, C. (2017). Characterization of autonomous families of Tc1/mariner  
1053 transposons in neoteleost genomes. *Mar Genomics*, 34, 67-77.  
1054 <https://doi.org/10.1016/j.margen.2017.05.003>
- 1055 Gao, B., Shen, D., Xue, S., Chen, C., Cui, H., & Song, C. (2016). The contribution of  
1056 transposable elements to size variations between four teleost genomes. *Mob*  
1057 *DNA*, 7, 4. <https://doi.org/10.1186/s13100-016-0059-7>
- 1058 Gao, B., Wang, Y., Diaby, M., Zong, W., Shen, D., Wang, S., Chen, C., Wang, X., &  
1059 Song, C. (2020). Evolution of pogo, a separate superfamily of IS630-Tc1-mariner  
1060 transposons, revealing recurrent domestication events in vertebrates. *Mob DNA*,  
1061 11, 25. <https://doi.org/10.1186/s13100-020-00220-0>
- 1062 Gibert, Y., Samarut, E., Ellis, M. K., Jackman, W. R., & Laudet, V. (2019). The first  
1063 formed tooth serves as a signalling centre to induce the formation of the dental  
1064 row in zebrafish. *Proc Biol Sci*, 286(1904), 20190401.  
1065 <https://doi.org/10.1098/rspb.2019.0401>
- 1066 Gorman, K. F., Tredwell, S. J., & Breden, F. (2007). The mutant guppy syndrome  
1067 curveback as a model for human heritable spinal curvature. *Spine (Phila Pa*  
1068 *1976)*, 32(7), 735-741. <https://doi.org/10.1097/01.brs.0000259081.40354.e2>
- 1069 Gray, R. S., Wilm, T. P., Smith, J., Bagnat, M., Dale, R. M., Topczewski, J., Johnson, S.  
1070 L., & Solnica-Krezel, L. (2014). Loss of col8a1a function during zebrafish  
1071 embryogenesis results in congenital vertebral malformations. *Dev Biol*, 386(1),  
1072 72-85. <https://doi.org/10.1016/j.ydbio.2013.11.028>
- 1073 Gurevich, A., Saveliev, V., Vyahhi, N., & Tesler, G. (2013). QAST: quality assessment  
1074 tool for genome assemblies. *Bioinformatics*, 29(8), 1072-1075.  
1075 <https://doi.org/10.1093/bioinformatics/btt086>
- 1076 Haas, B. J. TransposonPSI. <http://transposonpsi.sourceforge.net>.

- 1077 Hahn, M. W., Demuth, J. P., & Han, S. G. (2007). Accelerated rate of gene gain and loss  
1078 in primates. *Genetics*, *177*(3), 1941-1949.  
1079 <https://doi.org/10.1534/genetics.107.080077>
- 1080 Herzog, W., Sonntag, C., von der Hardt, S., Roehl, H. H., Varga, Z. M., &  
1081 Hammerschmidt, M. (2004). Fgf3 signaling from the ventral diencephalon is  
1082 required for early specification and subsequent survival of the zebrafish  
1083 adenohypophysis. *Development*, *131*(15), 3681-3692.  
1084 <https://doi.org/10.1242/dev.01235>
- 1085 Howe, K., Schiffer, P. H., Zielinski, J., Wiehe, T., Laird, G. K., Marioni, J. C., Soylemez,  
1086 O., Kondrashov, F., & Leptin, M. (2016). Structure and evolutionary history of a  
1087 large family of NLR proteins in the zebrafish. *Open Biol*, *6*(4), 160009.  
1088 <https://doi.org/10.1098/rsob.160009>
- 1089 Ivancevic, A., & Chuong, E. B. (2020). Transposable elements teach T cells new tricks.  
1090 *Proc Natl Acad Sci U S A*, *117*(17), 9145-9147.  
1091 <https://doi.org/10.1073/pnas.2004493117>
- 1092 Ivancevic, A. M., Kortschak, R. D., Bertozzi, T., & Adelson, D. L. (2018). Horizontal  
1093 transfer of BovB and L1 retrotransposons in eukaryotes. *Genome Biol*, *19*(1), 85.  
1094 <https://doi.org/10.1186/s13059-018-1456-7>
- 1095 Jackman, W. R., Davies, S. H., Lyons, D. B., Stauder, C. K., Denton-Schneider, B. R.,  
1096 Jowdry, A., Aigler, S. R., Vogel, S. A., & Stock, D. W. (2013). Manipulation of Fgf  
1097 and Bmp signaling in teleost fishes suggests potential pathways for the  
1098 evolutionary origin of multicuspid teeth. *Evol Dev*, *15*(2), 107-118.  
1099 <https://doi.org/10.1111/ede.12021>
- 1100 Jackman, W. R., Draper, B. W., & Stock, D. W. (2004). Fgf signaling is required for  
1101 zebrafish tooth development. *Dev Biol*, *274*(1), 139-157.  
1102 <https://doi.org/10.1016/j.ydbio.2004.07.003>
- 1103 Jones, P., Binns, D., Chang, H. Y., Fraser, M., Li, W., McAnulla, C., McWilliam, H.,  
1104 Maslen, J., Mitchell, A., Nuka, G., Pesseat, S., Quinn, A. F., Sangrador-Vegas,  
1105 A., Scheremetjew, M., Yong, S. Y., Lopez, R., & Hunter, S. (2014). InterProScan  
1106 5: genome-scale protein function classification. *Bioinformatics*, *30*(9), 1236-1240.  
1107 <https://doi.org/10.1093/bioinformatics/btu031>
- 1108 Kelley, J. L., Desvignes, T., McGowan, K. L., Perez, M., Rodriguez, L. A., Brown, A. P.,  
1109 Culumber, Z., & Tobler, M. (2021). microRNA expression variation as a potential  
1110 molecular mechanism contributing to adaptation to hydrogen sulphide. *J Evol*  
1111 *Biol*, *34*(6), 977-988. <https://doi.org/10.1111/jeb.13727>
- 1112 Kidwell, M. G. (2002). Transposable elements and the evolution of genome size in  
1113 eukaryotes. *Genetica*, *115*(1), 49-63. <https://doi.org/10.1023/a:1016072014259>
- 1114 Kim, D. I., Kai, W., Hosoya, S., Sato, M., Nozawa, A., Kuroyanagi, M., Jo, Y., Tasumi,  
1115 S., Suetake, H., Suzuki, Y., & Kikuchi, K. (2019). The genetic basis of scale-loss  
1116 phenotype in the rapid radiation of Takifugu fishes. *Genes (Basel)*, *10*(12).  
1117 <https://doi.org/10.3390/genes10121027>
- 1118 Klanten, O. S., Gaither, M. R., Greaves, S., Mills, K., O'Keeffe, K., Turnbull, J.,  
1119 McKinnon, R., & Booth, D. J. (2020). Genomic and morphological evidence of  
1120 distinct populations in the endemic common (weedy) seadragon *Phyllopteryx*

- 1121 *taeniolatus* (Syngnathidae) along the east coast of Australia. *PLoS ONE*, 15(12),  
1122 e0243446. <https://doi.org/10.1371/journal.pone.0243446>
- 1123 Kolmogorov, M., Yuan, J., Lin, Y., & Pevzner, P. A. (2019). Assembly of long, error-  
1124 prone reads using repeat graphs. *Nat Biotechnol*, 37(5), 540-546.  
1125 <https://doi.org/10.1038/s41587-019-0072-8>
- 1126 Korn, H., & Faber, D. S. (1975). Inputs from the posterior lateral line nerves upon the  
1127 goldfish Mauthner cell. I. Properties and synaptic localization of the excitatory  
1128 component. *Brain Research*, 96(2), 342-348. [https://doi.org/10.1016/0006-  
1129 8993\(75\)90745-3](https://doi.org/10.1016/0006-8993(75)90745-3)
- 1130 Korn, H., & Faber, D. S. (2005). The Mauthner cell half a century later: a neurobiological  
1131 model for decision-making? *Neuron*, 47(1), 13-28.  
1132 <https://doi.org/10.1016/j.neuron.2005.05.019>
- 1133 Krucken, J., Schroetel, R. M., Muller, I. U., Saidani, N., Marinovski, P., Benten, W. P.,  
1134 Stamm, O., & Wunderlich, F. (2004). Comparative analysis of the human gimap  
1135 gene cluster encoding a novel GTPase family. *Gene*, 341, 291-304.  
1136 <https://doi.org/10.1016/j.gene.2004.07.005>
- 1137 Kunarso, G., Chia, N. Y., Jeyakani, J., Hwang, C., Lu, X., Chan, Y. S., Ng, H. H., &  
1138 Bourque, G. (2010). Transposable elements have rewired the core regulatory  
1139 network of human embryonic stem cells. *Nat Genet*, 42(7), 631-634.  
1140 <https://doi.org/10.1038/ng.600>
- 1141 Leger, S., & Brand, M. (2002). Fgf8 and Fgf3 are required for zebrafish ear placode  
1142 induction, maintenance and inner ear patterning. *Mech Dev*, 119(1), 91-108.  
1143 [https://doi.org/10.1016/s0925-4773\(02\)00343-x](https://doi.org/10.1016/s0925-4773(02)00343-x)
- 1144 Leysen, H., Jouk, P., Brunain, M., Christiaens, J., & Adriaens, D. (2010). Cranial  
1145 architecture of tube-snouted gasterosteiformes (*Syngnathus rostellatus* and  
1146 *Hippocampus capensis*). *J Morphol*, 271(3), 255-270.  
1147 <https://doi.org/10.1002/jmor.10795>
- 1148 Li, C., Olave, M., Hou, Y., Qin, G., Schneider, R. F., Gao, Z., Tu, X., Wang, X., Qi, F.,  
1149 Nater, A., Kautt, A. F., Wan, S., Zhang, Y., Liu, Y., Zhang, H., Zhang, B., Zhang,  
1150 H., Qu, M., Liu, S., Chen, Z., Zhong, J., Zhang, H., Meng, L., Wang, K., Yin, J.,  
1151 Huang, L., Venkatesh, B., Meyer, A., Lu, X., & Lin, Q. (2021). Genome  
1152 sequences reveal global dispersal routes and suggest convergent genetic  
1153 adaptations in seahorse evolution. *Nat Commun*, 12(1), 1094.  
1154 <https://doi.org/10.1038/s41467-021-21379-x>
- 1155 Lin, Q., Fan, S., Zhang, Y., Xu, M., Zhang, H., Yang, Y., Lee, A. P., Woltering, J. M.,  
1156 Ravi, V., Gunter, H. M., Luo, W., Gao, Z., Lim, Z. W., Qin, G., Schneider, R. F.,  
1157 Wang, X., Xiong, P., Li, G., Wang, K., Min, J., Zhang, C., Qiu, Y., Bai, J., He, W.,  
1158 Bian, C., Zhang, X., Shan, D., Qu, H., Sun, Y., Gao, Q., Huang, L., Shi, Q.,  
1159 Meyer, A., & Venkatesh, B. (2016). The seahorse genome and the evolution of  
1160 its specialized morphology. *Nature*, 540(7633), 395-399.  
1161 <https://doi.org/10.1038/nature20595>
- 1162 Liu, N., Lee, C. H., Swigut, T., Grow, E., Gu, B., Bassik, M. C., & Wysocka, J. (2018).  
1163 Selective silencing of euchromatic L1s revealed by genome-wide screens for L1  
1164 regulators. *Nature*, 553(7687), 228-232. <https://doi.org/10.1038/nature25179>

- 1165 Longo, S. J., Faircloth, B. C., Meyer, A., Westneat, M. W., Alfaro, M. E., & Wainwright,  
1166 P. C. (2017). Phylogenomic analysis of a rapid radiation of misfit fishes  
1167 (Syngnathiformes) using ultraconserved elements. *Mol Phylogenet Evol*, 113, 33-  
1168 48. <https://doi.org/10.1016/j.ympev.2017.05.002>
- 1169 Lopez-Sanchez, C., Franco, D., Bonet, F., Garcia-Lopez, V., Aranega, A., & Garcia-  
1170 Martinez, V. (2015). Negative Fgf8-Bmp2 feed-back is regulated by miR-130  
1171 during early cardiac specification. *Dev Biol*, 406(1), 63-73.  
1172 <https://doi.org/10.1016/j.ydbio.2015.07.007>
- 1173 Lu, P., Minowada, G., & Martin, G. R. (2006). Increasing Fgf4 expression in the mouse  
1174 limb bud causes polysyndactyly and rescues the skeletal defects that result from  
1175 loss of Fgf8 function. *Development*, 133(1), 33-42.  
1176 <https://doi.org/10.1242/dev.02172>
- 1177 Lynch, M. (2007). *The Origins of Genome Architecture*. Oxford University Press.
- 1178 Lynch, M., & Conery, J. S. (2003). The origins of genome complexity. *Science*,  
1179 302(5649), 1401-1404. <https://doi.org/10.1126/science.1089370>
- 1180 Mank, J. E., & Avise, J. C. (2006). Phylogenetic conservation of chromosome numbers  
1181 in Actinopterygian fishes. *Genetica*, 127(1-3), 321-327.  
1182 <https://doi.org/10.1007/s10709-005-5248-0>
- 1183 Marom, R., Burrage, L. C., Venditti, R., Clement, A., Blanco-Sanchez, B., Jain, M., Scott,  
1184 D. A., Rosenfeld, J. A., Sutton, V. R., Shinawi, M., Mirzaa, G., DeVile, C.,  
1185 Roberts, R., Calder, A. D., Allgrove, J., Grafe, I., Lanza, D. G., Li, X., Joeng, K.  
1186 S., Lee, Y. C., Song, I. W., Sliepka, J. M., Batkovskyte, D., Washington, M.,  
1187 Dawson, B. C., Jin, Z., Jiang, M. M., Chen, S., Chen, Y., Tran, A. A., Emrick, L.  
1188 T., Murdock, D. R., Hanchard, N. A., Zapata, G. E., Mehta, N. R., Weis, M. A.,  
1189 Scott, A. A., Tremp, B. A., Phillips, J. B., Wegner, J., Taylor-Miller, T., Gibbs, R.  
1190 A., Muzny, D. M., Jhangiani, S. N., Hicks, J., Stottmann, R. W., Dickinson, M. E.,  
1191 Seavitt, J. R., Heaney, J. D., Eyre, D. R., Undiagnosed Diseases, N., Westerfield,  
1192 M., De Matteis, M. A., & Lee, B. (2021). COPB2 loss of function causes a  
1193 coatopathy with osteoporosis and developmental delay. *Am J Hum Genet*,  
1194 108(9), 1710-1724. <https://doi.org/10.1016/j.ajhg.2021.08.002>
- 1195 Martin-Smith, K. M., & Vincent, A. C. J. (2006). Exploitation and trade of Australian  
1196 seahorses, pipehorses, sea dragons and pipefishes (Family Syngnathidae).  
1197 *Oryx*, 40(2), 141-151. <https://doi.org/10.1017/s003060530600010x>
- 1198 Mattingsdal, M., Jentoft, S., Torresen, O. K., Knutsen, H., Hansen, M. M., Robalo, J. I.,  
1199 Zagrodzka, Z., Andre, C., & Gonzalez, E. B. (2018). A continuous genome  
1200 assembly of the corkwing wrasse (*Symphodus melops*). *Genomics*, 110(6), 399-  
1201 403. <https://doi.org/10.1016/j.ygeno.2018.04.009>
- 1202 Maves, L., Jackman, W., & Kimmel, C. B. (2002). FGF3 and FGF8 mediate a  
1203 rhombomere 4 signaling activity in the zebrafish hindbrain. *Development*,  
1204 129(16), 3825-3837. <https://www.ncbi.nlm.nih.gov/pubmed/12135921>
- 1205 Mendes, F. K., Vanderpool, D., Fulton, B., & Hahn, M. W. (2020). CAFE 5 models  
1206 variation in evolutionary rates among gene families. *Bioinformatics*.  
1207 <https://doi.org/10.1093/bioinformatics/btaa1022>

- 1208 Miyake, A., & Itoh, N. (2013). Fgf22 regulated by Fgf3/Fgf8 signaling is required for  
1209 zebrafish midbrain development. *Biol Open*, 2(5), 515-524.  
1210 <https://doi.org/10.1242/bio.20134226>
- 1211 Nechiporuk, A., & Raible, D. W. (2008). FGF-dependent mechanosensory organ  
1212 patterning in zebrafish. *Science*, 320(5884), 1774-1777.  
1213 <https://doi.org/10.1126/science.1156547>
- 1214 Niswander, L., & Martin, G. R. (1992). Fgf-4 expression during gastrulation, myogenesis,  
1215 limb and tooth development in the mouse. *Development*, 114(3), 755-768.  
1216 <https://www.ncbi.nlm.nih.gov/pubmed/1618140>
- 1217 Nomura, R., Kamei, E., Hotta, Y., Konishi, M., Miyake, A., & Itoh, N. (2006). Fgf16 is  
1218 essential for pectoral fin bud formation in zebrafish. *Biochem Biophys Res  
1219 Commun*, 347(1), 340-346. <https://doi.org/10.1016/j.bbrc.2006.06.108>
- 1220 Oulion, S., Bertrand, S., & Escriva, H. (2012). Evolution of the FGF Gene Family. *Int J  
1221 Evol Biol*, 2012, 298147. <https://doi.org/10.1155/2012/298147>
- 1222 Peskin, B., Henke, K., Cumplido, N., Treaster, S., Harris, M. P., Bagnat, M., & Arratia, G.  
1223 (2020). Notochordal signals establish phylogenetic identity of the teleost spine.  
1224 *Curr Biol*, 30(14), 2805-2814 e2803. <https://doi.org/10.1016/j.cub.2020.05.037>
- 1225 Prykhodzhiy, S. V., & Neumann, C. J. (2008). Distinct roles of Shh and Fgf signaling in  
1226 regulating cell proliferation during zebrafish pectoral fin development. *BMC Dev  
1227 Biol*, 8, 91. <https://doi.org/10.1186/1471-213X-8-91>
- 1228 Qu, M., Liu, Y., Zhang, Y., Wan, S., Ravi, V., Qin, G., Jiang, H., Wang, X., Zhang, H.,  
1229 Zhang, B., Gao, Z., Huysseune, A., Zhang, Z., Zhang, H., Chen, Z., Yu, H., Wu,  
1230 Y., Tang, L., Li, C., Zhong, J., Ma, L., Wang, F., Zheng, H., Yin, J., Witten, P. E.,  
1231 Meyer, A., Venkatesh, B., & Lin, Q. (2021). Seadragon genome analysis provides  
1232 insights into its phenotype and sex determination locus. *Sci Adv*, 7(34).  
1233 <https://doi.org/10.1126/sciadv.abg5196>
- 1234 R\_Core\_Team. (2019). A language and environment for statistical computing. R  
1235 Foundation for Statistical Computing,  
1236 . Vienna, Austria. URL <https://www.R-project.org/>.
- 1237 Rabosky, D. L., Chang, J., Title, P. O., Cowman, P. F., Sallan, L., Friedman, M.,  
1238 Kaschner, K., Garilao, C., Near, T. J., Coll, M., & Alfaro, M. E. (2018). An inverse  
1239 latitudinal gradient in speciation rate for marine fishes. *Nature*, 559(7714), 392-  
1240 395. <https://doi.org/10.1038/s41586-018-0273-1>
- 1241 Reuter, I., Jackels, J., Kneitz, S., Kuper, J., Lesch, K. P., & Lillesaar, C. (2019). Fgf3 is  
1242 crucial for the generation of monoaminergic cerebrospinal fluid contacting cells in  
1243 zebrafish. *Biol Open*, 8(6). <https://doi.org/10.1242/bio.040683>
- 1244 Roth, O., Solbakken, M. H., Torresen, O. K., Bayer, T., Matschiner, M., Baalsrud, H. T.,  
1245 Hoff, S. N. K., Briec, M. S. O., Haase, D., Hanel, R., Reusch, T. B. H., & Jentoft,  
1246 S. (2020). Evolution of male pregnancy associated with remodeling of canonical  
1247 vertebrate immunity in seahorses and pipefishes. *Proc Natl Acad Sci U S A*,  
1248 117(17), 9431-9439. <https://doi.org/10.1073/pnas.1916251117>
- 1249 Schnell, S., Demolliere, C., van den Berk, P., & Jacobs, H. (2006). Gimap4 accelerates  
1250 T-cell death. *Blood*, 108(2), 591-599. <https://doi.org/10.1182/blood-2005-11-4616>

- 1251 Schrader, L., & Schmitz, J. (2019). The impact of transposable elements in adaptive  
1252 evolution. *Mol Ecol*, 28(6), 1537-1549. <https://doi.org/10.1111/mec.14794>
- 1253 Shao, F., Wang, J., Xu, H., & Peng, Z. (2018). FishTEDB: a collective database of  
1254 transposable elements identified in the complete genomes of fish. *Database*  
1255 (*Oxford*), 2018. <https://doi.org/10.1093/database/bax106>
- 1256 Shono, T., Thiery, A. P., Cooper, R. L., Kurokawa, D., Britz, R., Okabe, M., & Fraser, G.  
1257 J. (2019). Evolution and developmental diversity of skin spines in pufferfishes.  
1258 *iScience*, 19, 1248-1259. <https://doi.org/10.1016/j.isci.2019.06.003>
- 1259 Singh, B. N., Tahara, N., Kawakami, Y., Das, S., Koyano-Nakagawa, N., Gong, W.,  
1260 Garry, M. G., & Garry, D. J. (2017). Etv2-miR-130a-Jarid2 cascade regulates  
1261 vascular patterning during embryogenesis. *PLoS ONE*, 12(12), e0189010.  
1262 <https://doi.org/10.1371/journal.pone.0189010>
- 1263 Small, C. M., Bassham, S., Catchen, J., Amores, A., Fuiten, A. M., Brown, R. S., Jones,  
1264 A. G., & Cresko, W. A. (2016). The genome of the Gulf pipefish enables  
1265 understanding of evolutionary innovations. *Genome Biol*, 17(1), 258.  
1266 <https://doi.org/10.1186/s13059-016-1126-6>
- 1267 Smit, A. F. A., Hubley, R., & Green, P. RepeatMasker at <http://repeatmasker.org>.
- 1268 Stachowiak, M. K., & Stachowiak, E. K. (2016). Evidence-based theory for integrated  
1269 genome regulation of ontogeny—an unprecedented role of nuclear FGFR1  
1270 signaling. *J Cell Physiol*, 231(6), 1199-1218. <https://doi.org/10.1002/jcp.25298>
- 1271 Stervander, M., & Cresko, W. A. (2021). A highly contiguous nuclear genome assembly  
1272 of the mandarinfish *Synchiropus splendidus* (Syngnathiformes:  
1273 Callionymidae). *G3 (Bethesda)*, in press. <https://doi.org/10.1093/g3journal/jkab306>
- 1274 Stiller, J., da Fonseca, R. R., Alfaro, M. E., Faircloth, B. C., Wilson, N. G., & Rouse, G.  
1275 W. (2021). Using ultraconserved elements to track the influence of sea-level  
1276 change on leafy seadragon populations. *Mol Ecol*, 30(6), 1364-1380.  
1277 <https://doi.org/10.1111/mec.15744>
- 1278 Stiller, J., Wilson, N. G., Donnellan, S., & Rouse, G. W. (2017). The leafy seadragon,  
1279 *Phycodurus eques*, a flagship species with low but structured genetic variability.  
1280 *J Hered*, 108(2), 152-162. <https://doi.org/10.1093/jhered/esw075>
- 1281 Stiller, J., Wilson, N. G., & Rouse, G. W. (2015). A spectacular new species of  
1282 seadragon (Syngnathidae). *R Soc Open Sci*, 2(2), 140458.  
1283 <https://doi.org/10.1098/rsos.140458>
- 1284 Stolting, K. N., & Wilson, A. B. (2007). Male pregnancy in seahorses and pipefish:  
1285 beyond the mammalian model. *BioEssays*, 29(9), 884-896.  
1286 <https://doi.org/10.1002/bies.20626>
- 1287 Terranova, C., Narla, S. T., Lee, Y. W., Bard, J., Parikh, A., Stachowiak, E. K.,  
1288 Tzanakakis, E. S., Buck, M. J., Birkaya, B., & Stachowiak, M. K. (2015). Global  
1289 developmental gene programming involves a nuclear form of fibroblast growth  
1290 factor receptor-1 (FGFR1). *PLoS ONE*, 10(4), e0123380.  
1291 <https://doi.org/10.1371/journal.pone.0123380>

- 1292 Vitturi, R., & Catalano, E. (1988). Karyotypes in two species of the genus *Hippocampus*  
1293 (Pisces: Syngnathiformes). *Marine Biology*, 99(1), 119-121.  
1294 <https://doi.org/10.1007/bf00644985>
- 1295 Vitturi, R., Libertini, A., Campolmi, M., Calderazzo, F., & Mazzola, A. (1998).  
1296 Conventional karyotype, nucleolar organizer regions and genome size in five  
1297 Mediterranean species of Syngnathidae (Pisces, Syngnathiformes). *Journal of*  
1298 *Fish Biology*, 52(4), 677-687. <https://doi.org/10.1111/j.1095-8649.1998.tb00812.x>
- 1299 Vurture, G. W., Sedlazeck, F. J., Nattestad, M., Underwood, C. J., Fang, H., Gurtowski,  
1300 J., & Schatz, M. C. (2017). GenomeScope: fast reference-free genome profiling  
1301 from short reads. *Bioinformatics*, 33(14), 2202-2204.  
1302 <https://doi.org/10.1093/bioinformatics/btx153>
- 1303 Walker, B. J., Abeel, T., Shea, T., Priest, M., Abouelliel, A., Sakthikumar, S., Cuomo, C.  
1304 A., Zeng, Q., Wortman, J., Young, S. K., & Earl, A. M. (2014). Pilon: an  
1305 integrated tool for comprehensive microbial variant detection and genome  
1306 assembly improvement. *PLoS ONE*, 9(11), e112963.  
1307 <https://doi.org/10.1371/journal.pone.0112963>
- 1308 Walshe, J., Maroon, H., McGonnell, I. M., Dickson, C., & Mason, I. (2002).  
1309 Establishment of hindbrain segmental identity requires signaling by FGF3 and  
1310 FGF8. *Curr Biol*, 12(13), 1117-1123. [https://doi.org/10.1016/s0960-](https://doi.org/10.1016/s0960-9822(02)00899-0)  
1311 [9822\(02\)00899-0](https://doi.org/10.1016/s0960-9822(02)00899-0)
- 1312 Wang, X. P., Suomalainen, M., Felszeghy, S., Zelarayan, L. C., Alonso, M. T., Plikus, M.  
1313 V., Maas, R. L., Chuong, C. M., Schimmang, T., & Thesleff, I. (2007). An  
1314 integrated gene regulatory network controls stem cell proliferation in teeth. *PLoS*  
1315 *Biol*, 5(6), e159. <https://doi.org/10.1371/journal.pbio.0050159>
- 1316 Waterhouse, R. M., Seppey, M., Simao, F. A., Manni, M., Ioannidis, P., Klioutchnikov,  
1317 G., Kriventseva, E. V., & Zdobnov, E. M. (2018). BUSCO Applications from  
1318 quality assessments to gene prediction and phylogenomics. *Molecular Biology*  
1319 *and Evolution*, 35(3), 543-548. <https://doi.org/10.1093/molbev/msx319>
- 1320 Waters, M. G., Serafini, T., & Rothman, J. E. (1991). 'Coatomer': a cytosolic protein  
1321 complex containing subunits of non-clathrin-coated Golgi transport vesicles.  
1322 *Nature*, 349(6306), 248-251. <https://doi.org/10.1038/349248a0>
- 1323 Weisenfeld, N. I., Kumar, V., Shah, P., Church, D. M., & Jaffe, D. B. (2017). Direct  
1324 determination of diploid genome sequences. *Genome Res*, 27(5), 757-767.  
1325 <https://doi.org/10.1101/gr.214874.116>
- 1326 Whittaker, R. H. (1965). Dominance and diversity in land plant communities: numerical  
1327 relations of species express the importance of competition in community function  
1328 and evolution. *Science*, 147(3655), 250-260.  
1329 <https://doi.org/10.1126/science.147.3655.250>
- 1330 Xie, Y., Su, N., Yang, J., Tan, Q., Huang, S., Jin, M., Ni, Z., Zhang, B., Zhang, D., Luo,  
1331 F., Chen, H., Sun, X., Feng, J. Q., Qi, H., & Chen, L. (2020). FGF/FGFR  
1332 signaling in health and disease. *Signal Transduct Target Ther*, 5(1), 181.  
1333 <https://doi.org/10.1038/s41392-020-00222-7>



- 1334 Yu, G., Wang, L. G., Han, Y., & He, Q. Y. (2012). clusterProfiler: an R package for  
1335 comparing biological themes among gene clusters. *OMICS*, 16(5), 284-287.  
1336 <https://doi.org/10.1089/omi.2011.0118>
- 1337 Zhang, Y.-H., Ravi, V., Qin, G., Dai, H., Zhang, H.-X., Han, F.-M., Wang, X., Liu, Y.-H.,  
1338 Yin, J.-P., Huang, L.-M., Venkatesh, B., & Lin, Q. (2020). Comparative genomics  
1339 reveal shared genomic changes in syngnathid fishes and signatures of genetic  
1340 convergence with placental mammals. *National Science Review*, 7(6), 964-977.  
1341 <https://doi.org/10.1093/nsr/nwaa002>
- 1342
